# Supplementary material for: Inferring Drug-Related Diseases Based on Convolutional Neural Network and Gated Recurrent Unit
Source: Molecules. 2019 Jul 25;24(15):2712. doi: 10.3390/molecules24152712 (PMC6696443; doi:10.3390/molecules24152712)
Supplement: Supplementary file 1 [file molecules-24-02712-s001.xlsx]

## Sheet: ST1
Drug name	Candidate disease name	Rank	Association score
6-aminocaproic-acid	Ascites	1	0.0367194
6-aminocaproic-acid	Fatigue	2	0.0347545
6-aminocaproic-acid	Motion-Sickness	3	0.0343094
6-aminocaproic-acid	Anorexia	4	0.0276399
6-aminocaproic-acid	Amenorrhea	5	0.0274366
6-aminocaproic-acid	Purpura	6	0.0264445
6-aminocaproic-acid	Emaciation	7	0.0261825
6-aminocaproic-acid	Cachexia	8	0.0256129
6-aminocaproic-acid	Bulimia	9	0.0248736
6-aminocaproic-acid	Catatonia	10	0.0233474
abacavir	Herpes-Zoster	1	0.0879998
abacavir	Virus-Diseases	2	0.0860687
abacavir	Adenovirus-Infections-Human	3	0.077252
abacavir	Prostatitis	4	0.0726393
abacavir	Cytomegalovirus-Infections	5	0.0721438
abacavir	Chickenpox	6	0.0640471
abacavir	Urinary-Bladder-Neck-Obstruction	7	0.0620374
abacavir	Respiratory-Syncytial-Virus-Infections	8	0.0619321
abacavir	Hepatitis-B	9	0.0613055
abacavir	Urinary-Retention	10	0.0601818
acarbose	Hypertriglyceridemia	1	0.190036
acarbose	Folic-Acid-Deficiency	2	0.102309
acarbose	Goiter	3	0.0999624
acarbose	Hypokalemia	4	0.0958954
acarbose	Nutritional-and-Metabolic-Diseases	5	0.0945172
acarbose	Hypoglycemia	6	0.0890434
acarbose	Hypocalcemia	7	0.0875697
acarbose	Hyperparathyroidism	8	0.08755
acarbose	Magnesium-Deficiency	9	0.0835141
acarbose	Cushing-Syndrome	10	0.0820593
acebutolol	Torsades-de-Pointes	1	0.295507
acebutolol	Heart-Failure	2	0.23698
acebutolol	Tachycardia-Paroxysmal	3	0.216969
acebutolol	Coronary-Disease	4	0.214816
acebutolol	Endocarditis	5	0.21122
acebutolol	Thrombophlebitis	6	0.190234
acebutolol	Embolism	7	0.189132
acebutolol	Angina-Unstable	8	0.187959
acebutolol	Aortic-Coarctation	9	0.186257
acebutolol	Thromboangiitis-Obliterans	10	0.182223
acetaminophen	Amenorrhea	1	0.0766006
acetaminophen	Cyanosis	2	0.0743092
acetaminophen	Edema	3	0.0692778
acetaminophen	Postoperative-Complications	4	0.0676213
acetaminophen	Ascites	5	0.0652204
acetaminophen	Emaciation	6	0.0648914
acetaminophen	Catatonia	7	0.061397
acetaminophen	Graft-Occlusion-Vascular	8	0.0602439
acetaminophen	Growth-Disorders	9	0.060243
acetaminophen	Ulcer	10	0.0602405
acetazolamide	Respiration-Disorders	1	0.354768
acetazolamide	Keratitis	2	0.199787
acetazolamide	Macular-Edema	3	0.16548
acetazolamide	Iritis	4	0.154862
acetazolamide	Uveitis	5	0.119093
acetazolamide	Uveitis-Anterior	6	0.115427
acetazolamide	Iridocyclitis	7	0.10937
acetazolamide	Glaucoma-Angle-Closure	8	0.0993168
acetazolamide	Eye-Diseases	9	0.0982996
acetazolamide	Scleritis	10	0.0841698
acetohexamide	Hypogonadism	1	0.171885
acetohexamide	Hyperparathyroidism	2	0.110333
acetohexamide	Hyperlipoproteinemia-Type-II	3	0.107791
acetohexamide	Amyloidosis	4	0.102827
acetohexamide	Hypertriglyceridemia	5	0.0965124
acetohexamide	Thyrotoxicosis	6	0.0936803
acetohexamide	Nutritional-and-Metabolic-Diseases	7	0.0928728
acetohexamide	Hyperaldosteronism	8	0.0926231
acetohexamide	Diabetic-Neuropathies	9	0.0892967
acetohexamide	Cushing-Syndrome	10	0.0891266
acitretin	Lupus-Erythematosus-Discoid	1	0.0453133
acitretin	Hyperlipoproteinemias	2	0.0369485
acitretin	Acne-Vulgaris	3	0.034057
acitretin	Polychondritis-Relapsing	4	0.0326003
acitretin	Facial-Dermatoses	5	0.0319275
acitretin	Dermatitis-Allergic-Contact	6	0.0303024
acitretin	Fibrocystic-Breast-Disease	7	0.0298506
acitretin	Scleroderma-Systemic	8	0.0266856
acitretin	Eczema	9	0.0254126
acitretin	Dermatitis-Seborrheic	10	0.0252733
acyclovir	Respiratory-Syncytial-Virus-Infections	1	0.597942
acyclovir	Adenovirus-Infections-Human	2	0.552823
acyclovir	Virus-Diseases	3	0.537955
acyclovir	Herpes-Zoster	4	0.51951
acyclovir	Cytomegalovirus-Infections	5	0.407678
acyclovir	Hepatitis-B	6	0.373705
acyclovir	Hepatitis-C-Chronic	7	0.317859
acyclovir	Sialorrhea	8	0.253906
acyclovir	Xerostomia	9	0.243284
acyclovir	Sarcoma-Kaposi	10	0.205661
adapalene	Hand-Dermatoses	1	0.0553578
adapalene	Epidermolysis-Bullosa	2	0.0478082
adapalene	Skin-Diseases-Eczematous	3	0.0438863
adapalene	Rheumatic-Diseases	4	0.043698
adapalene	Gynecomastia	5	0.0413141
adapalene	Photosensitivity-Disorders	6	0.0384531
adapalene	Foot-Dermatoses	7	0.0373794
adapalene	Obsessive-Compulsive-Disorder	8	0.0348425
adapalene	Myxedema	9	0.0332841
adapalene	Diabetes-Mellitus-Type-2	10	0.0293411
adefovir	Stomach-Ulcer	1	0.142879
adefovir	Duodenal-Ulcer	2	0.109738
adefovir	Virus-Diseases	3	0.0940465
adefovir	Respiratory-Syncytial-Virus-Infections	4	0.0931727
adefovir	Dysentery	5	0.0898037
adefovir	Enteritis	6	0.0878662
adefovir	Cytomegalovirus-Infections	7	0.0755294
adefovir	Pancreatitis	8	0.0751097
adefovir	Cholelithiasis	9	0.0728058
adefovir	Liver-Cirrhosis-Biliary	10	0.0715855
adenosine	Hyperlipoproteinemia-Type-II	1	0.219952
adenosine	Arteriosclerosis-Obliterans	2	0.148139
adenosine	Hyperlipoproteinemias	3	0.144148
adenosine	Abnormalities-Drug-Induced	4	0.141332
adenosine	Cystinosis	5	0.138106
adenosine	Folic-Acid-Deficiency	6	0.137905
adenosine	Edema	7	0.137229
adenosine	Infant-Premature-Diseases	8	0.129821
adenosine	Premenstrual-Syndrome	9	0.126885
adenosine	Hemorrhoids	10	0.122615
albendazole	Malaria-Avian	1	0.954294
albendazole	Malaria-Falciparum	2	0.94416
albendazole	Ascariasis	3	0.91637
albendazole	Mansonelliasis	4	0.904194
albendazole	Toxoplasmosis	5	0.85325
albendazole	Strongyloidiasis	6	0.844796
albendazole	Amebiasis	7	0.832188
albendazole	Trypanosomiasis	8	0.800843
albendazole	Trichinellosis	9	0.797416
albendazole	Malaria-Vivax	10	0.786036
albuterol	Food-Hypersensitivity	1	0.102199
albuterol	Bronchial-Spasm	2	0.0804279
albuterol	Autoimmune-Diseases	3	0.0741329
albuterol	Graft-vs-Host-Disease	4	0.0644002
albuterol	Respiratory-Tract-Diseases	5	0.0643192
albuterol	Anaphylaxis	6	0.0607165
albuterol	Respiration-Disorders	7	0.0603799
albuterol	Pleural-Effusion	8	0.0596684
albuterol	Airway-Obstruction	9	0.0504459
albuterol	Lymphoma-Non-Hodgkin	10	0.0434283
alclometasone	Eczema	1	0.549387
alclometasone	Skin-Diseases	2	0.360035
alclometasone	Dermatitis-Allergic-Contact	3	0.270025
alclometasone	Arthritis-Gouty	4	0.248014
alclometasone	Acne-Vulgaris	5	0.244266
alclometasone	Dermatitis-Seborrheic	6	0.243914
alclometasone	Collagen-Diseases	7	0.242254
alclometasone	Polychondritis-Relapsing	8	0.238338
alclometasone	Gynecomastia	9	0.236866
alclometasone	Hyperhidrosis	10	0.233638
alendronate	Spondylolysis	1	0.160183
alendronate	Joint-Diseases	2	0.078726
alendronate	Carcinoma-Squamous-Cell	3	0.0723217
alendronate	Medulloblastoma	4	0.0695738
alendronate	Neoplasms-Hormone-Dependent	5	0.0665927
alendronate	Leukemia-Promyelocytic-Acute	6	0.0644398
alendronate	Soft-Tissue-Neoplasms	7	0.0582026
alendronate	Osteolysis	8	0.0570982
alendronate	Liver-Neoplasms	9	0.0570043
alendronate	Osteoarthritis	10	0.0548788
alitretinoin	Adenovirus-Infections-Human	1	0.0926665
alitretinoin	Chickenpox	2	0.0921324
alitretinoin	Cytomegalovirus-Infections	3	0.0772255
alitretinoin	Lupus-Erythematosus-Discoid	4	0.0710652
alitretinoin	Rosacea	5	0.0703399
alitretinoin	Skin-Diseases-Eczematous	6	0.0645236
alitretinoin	Melanoma	7	0.0621432
alitretinoin	Gynecomastia	8	0.060581
alitretinoin	Respiratory-Syncytial-Virus-Infections	9	0.0600788
alitretinoin	Scleroderma-Systemic	10	0.0597397
allopurinol	Abnormalities-Drug-Induced	1	0.199592
allopurinol	Spondylolysis	2	0.143638
allopurinol	Hypoprothrombinemias	3	0.115819
allopurinol	Amyloidosis	4	0.109118
allopurinol	Bursitis	5	0.10848
allopurinol	Hypocalcemia	6	0.103063
allopurinol	Infant-Premature-Diseases	7	0.101637
allopurinol	Hyperlipoproteinemias	8	0.101024
allopurinol	Diabetes-Mellitus-Type-2	9	0.100326
allopurinol	Nutritional-and-Metabolic-Diseases	10	0.0985843
alprostadil	Infant-Premature-Diseases	1	0.530918
alprostadil	Abnormalities-Drug-Induced	2	0.482467
alprostadil	Hypoprothrombinemias	3	0.414381
alprostadil	Respiratory-Distress-Syndrome-Newborn	4	0.379267
alprostadil	Hyperlipoproteinemia-Type-II	5	0.378034
alprostadil	Cystinosis	6	0.323495
alprostadil	Thrombosis	7	0.309615
alprostadil	Embolism	8	0.296739
alprostadil	Arterial-Occlusive-Diseases	9	0.281765
alprostadil	Arteriosclerosis-Obliterans	10	0.279012
amantadine	Poisoning	1	0.193238
amantadine	Drug-Toxicity	2	0.163282
amantadine	Bites-Human	3	0.138155
amantadine	Essential-Tremor	4	0.114145
amantadine	Hyperprolactinemia	5	0.111848
amantadine	Epilepsy	6	0.111545
amantadine	Cluster-Headache	7	0.111335
amantadine	Parkinsonian-Disorders	8	0.111147
amantadine	Head-Injuries-Closed	9	0.100026
amantadine	Strabismus	10	0.0962736
amcinonide	Lupus-Erythematosus-Systemic	1	0.267848
amcinonide	Eczema	2	0.260766
amcinonide	Photosensitivity-Disorders	3	0.250873
amcinonide	Fibrocystic-Breast-Disease	4	0.250441
amcinonide	Skin-Diseases	5	0.244214
amcinonide	Epidermolysis-Bullosa	6	0.238091
amcinonide	Arthritis-Juvenile-Rheumatoid	7	0.221362
amcinonide	Arthritis-Gouty	8	0.21432
amcinonide	Pityriasis-Rosea	9	0.212831
amcinonide	Hyperhidrosis	10	0.21203
amifostine	Bites-Human	1	0.219322
amifostine	Burns	2	0.202123
amifostine	Malaria-Avian	3	0.0806126
amifostine	Toxocariasis	4	0.0663742
amifostine	Cryptosporidiosis	5	0.0538795
amifostine	Head-Injuries-Closed	6	0.0521119
amifostine	Spinal-Cord-Injuries	7	0.0499345
amifostine	Emaciation	8	0.0416519
amifostine	Depressive-Disorder	9	0.040338
amifostine	Extravasation-of-Diagnostic-and-Therapeutic-Materials	10	0.0362293
amikacin	Endocarditis-Subacute-Bacterial	1	0.105143
amikacin	Escherichia-coli-Infections	2	0.102262
amikacin	Bursitis	3	0.0999613
amikacin	Bronchitis	4	0.0955817
amikacin	Rhinitis	5	0.087871
amikacin	Joint-Diseases	6	0.0867307
amikacin	Herpes-Zoster-Ophthalmicus	7	0.0806336
amikacin	Pulmonary-Embolism	8	0.0803395
amikacin	Klebsiella-Infections	9	0.0801441
amikacin	Airway-Obstruction	10	0.0784135
amiloride	Cystinosis	1	0.210982
amiloride	Hyperlipoproteinemia-Type-II	2	0.163062
amiloride	Hyperlipoproteinemias	3	0.15178
amiloride	Infant-Premature-Diseases	4	0.138641
amiloride	Tachycardia-Supraventricular	5	0.137027
amiloride	Wolff-Parkinson-White-Syndrome	6	0.132548
amiloride	Obesity	7	0.126277
amiloride	Heartburn	8	0.122313
amiloride	Bradycardia	9	0.119282
amiloride	Enteritis	10	0.117173
aminoglutethimide	Thyroid-Neoplasms	1	0.156319
aminoglutethimide	Rhabdomyosarcoma	2	0.130007
aminoglutethimide	Leukemia-Myeloid-Acute	3	0.129339
aminoglutethimide	Carcinoma-Small-Cell	4	0.127462
aminoglutethimide	Neuroblastoma	5	0.122678
aminoglutethimide	Mesothelioma	6	0.113553
aminoglutethimide	Rectal-Neoplasms	7	0.112101
aminoglutethimide	Zollinger-Ellison-Syndrome	8	0.107983
aminoglutethimide	Glioblastoma	9	0.105278
aminoglutethimide	Neoplasms	10	0.102676
aminophylline	Pulmonary-Edema	1	0.335545
aminophylline	Respiratory-Tract-Diseases	2	0.315841
aminophylline	Airway-Obstruction	3	0.31169
aminophylline	Respiration-Disorders	4	0.310234
aminophylline	Pleural-Effusion	5	0.299681
aminophylline	Hypertension-Pulmonary	6	0.294432
aminophylline	Respiratory-Distress-Syndrome-Adult	7	0.291783
aminophylline	Respiratory-Distress-Syndrome-Newborn	8	0.267895
aminophylline	Altitude-Sickness	9	0.224276
aminophylline	Cystic-Fibrosis	10	0.22187
aminosalicylic-acid	Stomach-Ulcer	1	0.13646
aminosalicylic-acid	Irritable-Bowel-Syndrome	2	0.106867
aminosalicylic-acid	Peptic-Ulcer	3	0.100884
aminosalicylic-acid	Colonic-Diseases-Functional	4	0.0934423
aminosalicylic-acid	Cholelithiasis	5	0.0901505
aminosalicylic-acid	Giardiasis	6	0.0887021
aminosalicylic-acid	Esophageal-Spasm-Diffuse	7	0.0854126
aminosalicylic-acid	Proctitis	8	0.0644804
aminosalicylic-acid	Liver-Cirrhosis	9	0.0597721
aminosalicylic-acid	Colonic-Diseases	10	0.0590524
amiodarone	Arteriosclerosis-Obliterans	1	0.0922949
amiodarone	Constipation	2	0.0818924
amiodarone	Heart-Failure	3	0.0806627
amiodarone	Dyspepsia	4	0.0792487
amiodarone	Aortic-Coarctation	5	0.078543
amiodarone	Postoperative-Complications	6	0.0776507
amiodarone	Amenorrhea	7	0.0773535
amiodarone	Premenstrual-Syndrome	8	0.0696958
amiodarone	Tetralogy-of-Fallot	9	0.0694806
amiodarone	Raynaud-Disease	10	0.0686169
amitriptyline	Low-Back-Pain	1	0.0997671
amitriptyline	Dysmenorrhea	2	0.0977115
amitriptyline	Schizophrenia-Paranoid	3	0.0966622
amitriptyline	Pain-Postoperative	4	0.0942239
amitriptyline	Headache	5	0.0920006
amitriptyline	Attention-Deficit-Disorder-with-Hyperactivity	6	0.0890999
amitriptyline	Pain-Intractable	7	0.0866907
amitriptyline	Flank-Pain	8	0.0814514
amitriptyline	Facial-Pain	9	0.0731139
amitriptyline	Causalgia	10	0.0719424
amlexanox	Hyperbilirubinemia	1	0.0380885
amlexanox	Intraoperative-Complications	2	0.0361573
amlexanox	Cyanosis	3	0.0336925
amlexanox	Postoperative-Complications	4	0.0324621
amlexanox	Bronchial-Spasm	5	0.0310256
amlexanox	Edema	6	0.0302904
amlexanox	Epilepsies-Partial	7	0.0285493
amlexanox	Fever	8	0.027912
amlexanox	Anxiety-Disorders	9	0.0218566
amlexanox	Shock	10	0.0213036
amlodipine	Heart-Arrest	1	0.0870313
amlodipine	Myocardial-Infarction	2	0.0859386
amlodipine	Vasculitis	3	0.0858589
amlodipine	Aortic-Aneurysm	4	0.0783938
amlodipine	Varicose-Veins	5	0.0782757
amlodipine	Epilepsy-Complex-Partial	6	0.075888
amlodipine	Diabetic-Angiopathies	7	0.0731482
amlodipine	Epilepsy-Tonic-Clonic	8	0.0713908
amlodipine	Thromboangiitis-Obliterans	9	0.0703209
amlodipine	Ventricular-Dysfunction-Left	10	0.0676143
amoxapine	Stress-Disorders-Post-Traumatic	1	0.0808081
amoxapine	Dementia	2	0.0719259
amoxapine	Schizophrenia-Paranoid	3	0.0678142
amoxapine	Alzheimer-Disease	4	0.0677451
amoxapine	Alcoholic-Neuropathy	5	0.0640877
amoxapine	Substance-Related-Disorders	6	0.0638817
amoxapine	Phobic-Disorders	7	0.0632799
amoxapine	Substance-Withdrawal-Syndrome	8	0.0628936
amoxapine	Tobacco-Use-Disorder	9	0.06162
amoxapine	Overdose	10	0.0539804
amoxicillin	Burns	1	0.277025
amoxicillin	Ear-Diseases	2	0.211824
amoxicillin	Otitis-Externa	3	0.208886
amoxicillin	Respiratory-Syncytial-Virus-Infections	4	0.202301
amoxicillin	Pseudomonas-Infections	5	0.180155
amoxicillin	Drug-Toxicity	6	0.177467
amoxicillin	Gram-Negative-Bacterial-Infections	7	0.176572
amoxicillin	Rhinitis	8	0.173699
amoxicillin	Epididymitis	9	0.162278
amoxicillin	Wound-Infection	10	0.161341
ampicillin	Burns	1	0.450604
ampicillin	Meningitis-Bacterial	2	0.303682
ampicillin	Pseudomonas-Infections	3	0.301308
ampicillin	Skin-Diseases-Infectious	4	0.300428
ampicillin	Radiation-Injuries-Experimental	5	0.300137
ampicillin	Candidiasis-Cutaneous	6	0.298077
ampicillin	Otitis-Media-Suppurative	7	0.295478
ampicillin	Pneumonia-Bacterial	8	0.295419
ampicillin	Proteus-Infections	9	0.29519
ampicillin	Sarcoma-Ewings	10	0.289246
amprenavir	Herpes-Zoster	1	0.108908
amprenavir	Adenovirus-Infections-Human	2	0.0880934
amprenavir	Virus-Diseases	3	0.0869124
amprenavir	Prostatic-Hyperplasia	4	0.0716052
amprenavir	Chickenpox	5	0.0603161
amprenavir	Respiratory-Syncytial-Virus-Infections	6	0.0574376
amprenavir	Cystitis	7	0.0563128
amprenavir	Hepatitis-C-Chronic	8	0.0556896
amprenavir	Cytomegalovirus-Infections	9	0.054872
amprenavir	Drug-Hypersensitivity	10	0.0531701
anagrelide	Thrombocythemia-Essential	1	0.312482
anagrelide	Elephantiasis	2	0.27029
anagrelide	Hypereosinophilic-Syndrome	3	0.257053
anagrelide	Blood-Coagulation-Disorders	4	0.242043
anagrelide	Histiocytosis	5	0.234152
anagrelide	Anemia-Megaloblastic	6	0.207608
anagrelide	Hematologic-Diseases	7	0.20374
anagrelide	Neutropenia	8	0.178834
anagrelide	Hypoprothrombinemias	9	0.141866
anagrelide	Anemia-Pernicious	10	0.13198
anastrozole	Familial-Mediterranean-Fever	1	0.0495871
anastrozole	Stomach-Neoplasms	2	0.0455436
anastrozole	Pityriasis-Rosea	3	0.0454688
anastrozole	Medulloblastoma	4	0.0422403
anastrozole	Pheochromocytoma	5	0.0421926
anastrozole	Hand-Dermatoses	6	0.0419506
anastrozole	Urinary-Bladder-Neoplasms	7	0.0410433
anastrozole	Eczema	8	0.0394232
anastrozole	Pemphigoid-Bullous	9	0.0391893
anastrozole	Uterine-Neoplasms	10	0.0389886
anisindione	Ventricular-Dysfunction-Left	1	0.26186
anisindione	Arterial-Occlusive-Diseases	2	0.244008
anisindione	Peripheral-Vascular-Diseases	3	0.242828
anisindione	Aortic-Arch-Syndromes	4	0.233027
anisindione	Hemorrhoids	5	0.221915
anisindione	Thrombosis	6	0.213153
anisindione	Raynaud-Disease	7	0.209008
anisindione	Heart-Failure	8	0.208315
anisindione	Hypotension	9	0.207685
anisindione	Varicose-Veins	10	0.203138
apraclonidine	Glaucoma	1	0.165078
apraclonidine	Macular-Edema	2	0.126912
apraclonidine	Conjunctivitis	3	0.117963
apraclonidine	Uveitis-Anterior	4	0.112276
apraclonidine	Uveitis	5	0.111153
apraclonidine	Iridocyclitis	6	0.106052
apraclonidine	Iritis	7	0.105327
apraclonidine	Conjunctivitis-Allergic	8	0.0985226
apraclonidine	Keratitis	9	0.081113
apraclonidine	Blepharospasm	10	0.0737139
ardeparin	Pulmonary-Valve-Stenosis	1	0.0973107
ardeparin	Vasculitis	2	0.0943679
ardeparin	Tricuspid-Atresia	3	0.0912372
ardeparin	Hypotension	4	0.0871927
ardeparin	Coronary-Disease	5	0.0867485
ardeparin	Thromboangiitis-Obliterans	6	0.0843934
ardeparin	Aortic-Aneurysm	7	0.0795578
ardeparin	Myocardial-Infarction	8	0.0795153
ardeparin	Embolism	9	0.074674
ardeparin	Heart-Arrest	10	0.0731604
arformoterol	Hypertension-Pulmonary	1	0.0911642
arformoterol	Bronchial-Spasm	2	0.0618829
arformoterol	Food-Hypersensitivity	3	0.0614687
arformoterol	Respiration-Disorders	4	0.0581306
arformoterol	Graft-vs-Host-Disease	5	0.0534448
arformoterol	Airway-Obstruction	6	0.05022
arformoterol	Hypersensitivity	7	0.0487498
arformoterol	Autoimmune-Diseases	8	0.0485443
arformoterol	Drug-Hypersensitivity	9	0.0473114
arformoterol	Conjunctivitis-Allergic	10	0.0459906
argatroban	Hypereosinophilic-Syndrome	1	0.160462
argatroban	Neutropenia	2	0.152421
argatroban	Blood-Coagulation-Disorders	3	0.127671
argatroban	Thrombocythemia-Essential	4	0.122728
argatroban	Histiocytosis	5	0.117952
argatroban	Hypoprothrombinemias	6	0.110591
argatroban	Anemia-Pernicious	7	0.0761525
argatroban	Hematologic-Diseases	8	0.0757557
argatroban	Polycythemia-Vera	9	0.0737117
argatroban	Elephantiasis	10	0.0723387
aripiprazole	Attention-Deficit-Disorder-with-Hyperactivity	1	0.108706
aripiprazole	Anxiety-Disorders	2	0.101017
aripiprazole	Psychotic-Disorders	3	0.0885851
aripiprazole	Tobacco-Use-Disorder	4	0.0782437
aripiprazole	Panic-Disorder	5	0.0536729
aripiprazole	Child-Behavior-Disorders	6	0.044898
aripiprazole	Alcoholism	7	0.0427951
aripiprazole	Phobic-Disorders	8	0.0411737
aripiprazole	Bipolar-Disorder	9	0.0409317
aripiprazole	Conduct-Disorder	10	0.0382334
arsenic-trioxide	Paget-Disease-Extramammary	1	0.153785
arsenic-trioxide	Lung-Neoplasms	2	0.148397
arsenic-trioxide	Carcinoma-Squamous-Cell	3	0.146644
arsenic-trioxide	Carcinoma-Non-Small-Cell-Lung	4	0.142512
arsenic-trioxide	Melanoma	5	0.140523
arsenic-trioxide	Medulloblastoma	6	0.139426
arsenic-trioxide	Carcinoma-Medullary	7	0.137782
arsenic-trioxide	Ependymoma	8	0.137227
arsenic-trioxide	Mesothelioma	9	0.137024
arsenic-trioxide	Soft-Tissue-Neoplasms	10	0.134024
aspirin	Bursitis	1	0.385576
aspirin	Osteoporosis-Postmenopausal	2	0.3548
aspirin	Arthritis	3	0.342107
aspirin	Arthritis-Gouty	4	0.308826
aspirin	Joint-Diseases	5	0.293443
aspirin	Osteolysis	6	0.255078
aspirin	Rheumatic-Diseases	7	0.244579
aspirin	Spondylolysis	8	0.233147
aspirin	Scalp-Dermatoses	9	0.201177
aspirin	Muscle-Cramp	10	0.191325
atenolol	Hypertension-Malignant	1	0.398281
atenolol	Ventricular-Dysfunction-Left	2	0.382123
atenolol	Vasculitis	3	0.35712
atenolol	Tetralogy-of-Fallot	4	0.354757
atenolol	Venous-Thrombosis	5	0.336357
atenolol	Hypotension	6	0.335513
atenolol	Embolism	7	0.319311
atenolol	Thrombophlebitis	8	0.315019
atenolol	Arteriosclerosis-Obliterans	9	0.310953
atenolol	Hypoplastic-Left-Heart-Syndrome	10	0.302896
atomoxetine	Attention-Deficit-and-Disruptive-Behavior-Disorders	1	0.157258
atomoxetine	Schizophrenia	2	0.0834708
atomoxetine	Phobic-Disorders	3	0.0786215
atomoxetine	Substance-Withdrawal-Syndrome	4	0.0544671
atomoxetine	Alcoholism	5	0.0455806
atomoxetine	Opioid-Related-Disorders	6	0.044835
atomoxetine	Schizophrenia-Paranoid	7	0.0435031
atomoxetine	Conduct-Disorder	8	0.0394196
atomoxetine	Psychotic-Disorders	9	0.0362896
atomoxetine	Overdose	10	0.033578
atorvastatin	Nutritional-and-Metabolic-Diseases	1	0.463719
atorvastatin	Folic-Acid-Deficiency	2	0.337072
atorvastatin	Cystinosis	3	0.297508
atorvastatin	Hypocalcemia	4	0.286249
atorvastatin	Amyloidosis	5	0.283714
atorvastatin	Magnesium-Deficiency	6	0.27516
atorvastatin	Hypercalcemia	7	0.251299
atorvastatin	Anemia-Pernicious	8	0.25036
atorvastatin	Hyperlipoproteinemia-Type-II	9	0.246537
atorvastatin	Hypoglycemia	10	0.240422
atovaquone	Toxoplasmosis	1	0.21409
atovaquone	Opisthorchiasis	2	0.155211
atovaquone	Pulmonary-Edema	3	0.0878335
atovaquone	Enterobiasis	4	0.0814026
atovaquone	Strongyloidiasis	5	0.0807472
atovaquone	Hymenolepiasis	6	0.0770065
atovaquone	Necatoriasis	7	0.0714664
atovaquone	Clonorchiasis	8	0.0697555
atovaquone	Amebiasis	9	0.0678785
atovaquone	Epilepsies-Partial	10	0.0677894
atropine	Poisoning	1	0.171995
atropine	Scleritis	2	0.152073
atropine	Macular-Edema	3	0.142973
atropine	Hypertension-Malignant	4	0.13156
atropine	Ventricular-Dysfunction-Left	5	0.128657
atropine	Esophagitis	6	0.121659
atropine	Conjunctivitis	7	0.119495
atropine	Aortic-Aneurysm	8	0.117497
atropine	Bites-Human	9	0.116302
atropine	Keratitis	10	0.11402
azatadine	Conjunctivitis-Allergic	1	0.127319
azatadine	Drug-Hypersensitivity	2	0.119946
azatadine	Anaphylaxis	3	0.116384
azatadine	Graft-vs-Host-Disease	4	0.111612
azatadine	Otitis-Externa	5	0.104312
azatadine	Autoimmune-Diseases	6	0.10025
azatadine	Status-Asthmaticus	7	0.0998593
azatadine	Thyroiditis-Autoimmune	8	0.0995268
azatadine	Food-Hypersensitivity	9	0.0901264
azatadine	Hypertension-Pulmonary	10	0.0797581
azathioprine	Addison-Disease	1	0.259417
azathioprine	Hypersensitivity	2	0.236459
azathioprine	Anaphylaxis	3	0.227339
azathioprine	Autoimmune-Diseases	4	0.225218
azathioprine	Food-Hypersensitivity	5	0.217513
azathioprine	Duodenal-Ulcer	6	0.208066
azathioprine	Colonic-Diseases	7	0.194076
azathioprine	Inflammatory-Bowel-Diseases	8	0.18895
azathioprine	Drug-Hypersensitivity	9	0.187353
azathioprine	Sigmoid-Diseases	10	0.180297
azelaic-acid	Dermatitis-Seborrheic	1	0.107543
azelaic-acid	Lupus-Erythematosus-Discoid	2	0.0995417
azelaic-acid	Dermatitis	3	0.0837866
azelaic-acid	Gynecomastia	4	0.0834457
azelaic-acid	Sunburn	5	0.0803862
azelaic-acid	Hyperhidrosis	6	0.0783269
azelaic-acid	Collagen-Diseases	7	0.0758622
azelaic-acid	Rheumatic-Diseases	8	0.0732923
azelaic-acid	Pemphigoid-Bullous	9	0.0658946
azelaic-acid	Fibrosarcoma	10	0.0636329
azelastine	Ear-Diseases	1	0.296235
azelastine	Otitis-Externa	2	0.255033
azelastine	Asthma	3	0.182333
azelastine	Otitis-Media	4	0.174911
azelastine	Uveitis	5	0.154088
azelastine	Pulmonary-Emphysema	6	0.15171
azelastine	Hypersensitivity	7	0.144227
azelastine	Addison-Disease	8	0.144095
azelastine	Respiratory-Distress-Syndrome-Adult	9	0.143311
azelastine	Respiratory-Tract-Diseases	10	0.142107
azithromycin	Otitis-Externa	1	0.251971
azithromycin	Ear-Diseases	2	0.214967
azithromycin	Chromoblastomycosis	3	0.19996
azithromycin	Skin-Diseases-Bacterial	4	0.198427
azithromycin	Impetigo	5	0.19616
azithromycin	Sporotrichosis	6	0.191978
azithromycin	Oral-Ulcer	7	0.175372
azithromycin	Paracoccidioidomycosis	8	0.173559
azithromycin	Airway-Obstruction	9	0.152248
azithromycin	Pneumonia-Bacterial	10	0.14812
aztreonam	Primary-Ovarian-Insufficiency	1	0.123704
aztreonam	Urethritis	2	0.118078
aztreonam	Urinary-Bladder-Diseases	3	0.106381
aztreonam	Nephrotic-Syndrome	4	0.100881
aztreonam	Menorrhagia	5	0.094789
aztreonam	Abortion-Spontaneous	6	0.0946432
aztreonam	Kidney-Diseases	7	0.093649
aztreonam	Infertility-Male	8	0.0898598
aztreonam	Endometrial-Hyperplasia	9	0.0892525
aztreonam	Urinary-Incontinence	10	0.0873744
bacampicillin	Rhinitis	1	0.206949
bacampicillin	Rhinitis-Vasomotor	2	0.16596
bacampicillin	Maxillary-Sinusitis	3	0.139463
bacampicillin	Virus-Diseases	4	0.126769
bacampicillin	Kidney-Diseases	5	0.122107
bacampicillin	Campylobacter-Infections	6	0.11435
bacampicillin	Spondylitis-Ankylosing	7	0.113993
bacampicillin	Sinusitis	8	0.109823
bacampicillin	Mycobacterium-avium-intracellulare-Infection	9	0.109661
bacampicillin	Pneumonia	10	0.109215
bacitracin	Keratitis	1	0.308536
bacitracin	Glaucoma-Angle-Closure	2	0.306072
bacitracin	Blepharospasm	3	0.294202
bacitracin	Conjunctivitis	4	0.238438
bacitracin	Iritis	5	0.21309
bacitracin	Eye-Diseases	6	0.212438
bacitracin	Uveitis	7	0.210075
bacitracin	Ocular-Hypertension	8	0.202266
bacitracin	Scleritis	9	0.201781
bacitracin	Glaucoma	10	0.198742
baclofen	Parkinson-Disease	1	0.58826
baclofen	Epilepsy-Absence	2	0.572909
baclofen	Head-Injuries-Closed	3	0.554809
baclofen	Epilepsies-Partial	4	0.538026
baclofen	Brain-Edema	5	0.536313
baclofen	Seizures-Febrile	6	0.535314
baclofen	Epilepsy-Temporal-Lobe	7	0.516265
baclofen	Strabismus	8	0.508939
baclofen	Tyrosinemias	9	0.504422
baclofen	Status-Epilepticus	10	0.500012
balsalazide	Esophagitis-Peptic	1	0.120472
balsalazide	Colonic-Diseases	2	0.112861
balsalazide	Proctitis	3	0.0926697
balsalazide	Liver-Cirrhosis	4	0.091205
balsalazide	Colonic-Diseases-Functional	5	0.086271
balsalazide	Crohn-Disease	6	0.0702413
balsalazide	Pancreatitis	7	0.0699686
balsalazide	Duodenal-Ulcer	8	0.0633165
balsalazide	Dysentery	9	0.063002
balsalazide	Proctocolitis	10	0.0627341
beclomethasone	Food-Hypersensitivity	1	0.181066
beclomethasone	Conjunctivitis-Allergic	2	0.151097
beclomethasone	Drug-Hypersensitivity	3	0.138176
beclomethasone	Respiratory-Tract-Diseases	4	0.135409
beclomethasone	Respiration-Disorders	5	0.130791
beclomethasone	Pleural-Effusion	6	0.12848
beclomethasone	Pulmonary-Emphysema	7	0.120289
beclomethasone	Thyroiditis-Autoimmune	8	0.111319
beclomethasone	Airway-Obstruction	9	0.108533
beclomethasone	Graft-vs-Host-Disease	10	0.104681
benazepril	Hyperlipoproteinemias	1	0.201851
benazepril	Hypotension	2	0.135688
benazepril	Arteriosclerosis	3	0.128467
benazepril	Hyperaldosteronism	4	0.125898
benazepril	Varicose-Veins	5	0.122804
benazepril	Arteriosclerosis-Obliterans	6	0.113313
benazepril	Myocardial-Infarction	7	0.110465
benazepril	Adrenocortical-Hyperfunction	8	0.109595
benazepril	Peripheral-Vascular-Diseases	9	0.103565
benazepril	Coronary-Artery-Disease	10	0.102443
bendroflumethiazide	Tachycardia-Supraventricular	1	0.103307
bendroflumethiazide	Thromboangiitis-Obliterans	2	0.0911069
bendroflumethiazide	Pyelonephritis	3	0.0827587
bendroflumethiazide	Arrhythmias-Cardiac	4	0.0800946
bendroflumethiazide	Hypotension	5	0.0749871
bendroflumethiazide	Ductus-Arteriosus-Patent	6	0.0742328
bendroflumethiazide	Cardiomyopathy-Dilated	7	0.0736162
bendroflumethiazide	Prostatitis	8	0.0693865
bendroflumethiazide	Arterial-Occlusive-Diseases	9	0.069298
bendroflumethiazide	Tachycardia-Atrioventricular-Nodal-Reentry	10	0.0685704
benzocaine	Esophageal-Spasm-Diffuse	1	0.455686
benzocaine	Mouth-Diseases	2	0.386474
benzocaine	Gastroesophageal-Reflux	3	0.328535
benzocaine	Ear-Diseases	4	0.328091
benzocaine	Sialorrhea	5	0.293395
benzocaine	Extravasation-of-Diagnostic-and-Therapeutic-Materials	6	0.258094
benzocaine	Inflammation	7	0.251522
benzocaine	Xerostomia	8	0.230505
benzocaine	Pain	9	0.224584
benzocaine	Anorexia	10	0.193063
benzonatate	Nausea	1	0.0959103
benzonatate	Fever	2	0.0835231
benzonatate	Respiratory-Distress-Syndrome-Adult	3	0.0745263
benzonatate	Bulimia	4	0.0740414
benzonatate	Vomiting	5	0.0739687
benzonatate	Edema	6	0.0717333
benzonatate	Pain	7	0.0695267
benzonatate	Anorexia	8	0.0645512
benzonatate	Ulcer	9	0.0627189
benzonatate	Constipation	10	0.0618692
benzquinamide	Hot-Flashes	1	0.0914033
benzquinamide	Cyanosis	2	0.0755781
benzquinamide	Motion-Sickness	3	0.0696524
benzquinamide	Amenorrhea	4	0.0671289
benzquinamide	Dyspepsia	5	0.0653874
benzquinamide	Bulimia	6	0.0626912
benzquinamide	Hyperbilirubinemia	7	0.0619973
benzquinamide	Hemorrhage	8	0.0614483
benzquinamide	Emaciation	9	0.0609832
benzquinamide	Leukocytosis	10	0.0605971
benzthiazide	Kidney-Diseases	1	0.38039
benzthiazide	Nephritis	2	0.121333
benzthiazide	Vasculitis	3	0.10155
benzthiazide	Heart-Block	4	0.0839342
benzthiazide	Venous-Thrombosis	5	0.0817154
benzthiazide	Tachycardia-Atrioventricular-Nodal-Reentry	6	0.0784355
benzthiazide	Wolff-Parkinson-White-Syndrome	7	0.0783286
benzthiazide	Sinoatrial-Block	8	0.0778289
benzthiazide	Heart-Arrest	9	0.0772819
benzthiazide	Bradycardia	10	0.0766926
benztropine	Parkinsonian-Disorders	1	0.253637
benztropine	Cystinosis	2	0.116966
benztropine	Epilepsy-Benign-Neonatal	3	0.0886452
benztropine	Infant-Premature-Diseases	4	0.0866901
benztropine	Parkinson-Disease-Postencephalitic	5	0.0836346
benztropine	Gaucher-Disease	6	0.0533536
benztropine	Hyperprolactinemia	7	0.0521869
benztropine	Cystic-Fibrosis	8	0.0501034
benztropine	Hypoprothrombinemias	9	0.05001
benztropine	Intracranial-Hypertension	10	0.0479769
bepridil	Heart-Failure	1	0.106006
bepridil	Arteriosclerosis	2	0.0900991
bepridil	Ductus-Arteriosus-Patent	3	0.0854589
bepridil	Endocarditis	4	0.084633
bepridil	Myocardial-Infarction	5	0.0788206
bepridil	Tricuspid-Atresia	6	0.074446
bepridil	Thromboembolism	7	0.0649222
bepridil	Heart-Arrest	8	0.0644122
bepridil	Arteriosclerosis-Obliterans	9	0.0604372
bepridil	Embolism	10	0.0595481
betamethasone	Keratosis	1	0.413967
betamethasone	Gynecomastia	2	0.401598
betamethasone	Osteoarthritis	3	0.386687
betamethasone	Skin-Diseases-Eczematous	4	0.36264
betamethasone	Myxedema	5	0.353752
betamethasone	Pityriasis-Rosea	6	0.352458
betamethasone	Epidermolysis-Bullosa	7	0.348999
betamethasone	Gout	8	0.346619
betamethasone	Dermatitis	9	0.346127
betamethasone	Eczema	10	0.344203
betaxolol	Keratitis	1	0.157493
betaxolol	Uveitis-Anterior	2	0.15437
betaxolol	Scleritis	3	0.145625
betaxolol	Blepharospasm	4	0.104857
betaxolol	Macular-Edema	5	0.103833
betaxolol	Iridocyclitis	6	0.102903
betaxolol	Eye-Diseases	7	0.0907895
betaxolol	Glaucoma	8	0.0770656
betaxolol	Conjunctivitis	9	0.071698
betaxolol	Iritis	10	0.0710866
bethanechol	Esophageal-Spasm-Diffuse	1	0.302627
bethanechol	Mouth-Diseases	2	0.1995
bethanechol	Sialorrhea	3	0.194168
bethanechol	Xerostomia	4	0.182516
bethanechol	Gastrointestinal-Diseases	5	0.152737
bethanechol	Pregnancy-Ectopic	6	0.141127
bethanechol	Infertility-Female	7	0.138033
bethanechol	Inflammatory-Bowel-Diseases	8	0.131051
bethanechol	Esophagitis-Peptic	9	0.129266
bethanechol	Kidney-Failure-Acute	10	0.125769
bexarotene	Elephantiasis	1	0.153964
bexarotene	Thrombocytopenia	2	0.11124
bexarotene	Polycythemia-Vera	3	0.110959
bexarotene	Autoimmune-Diseases	4	0.109711
bexarotene	Hematologic-Diseases	5	0.0927708
bexarotene	Hypoprothrombinemias	6	0.0806131
bexarotene	Blood-Coagulation-Disorders	7	0.0768882
bexarotene	Anemia-Pernicious	8	0.0756922
bexarotene	Neutropenia	9	0.0726846
bexarotene	Histiocytosis	10	0.068986
bicalutamide	Pyelonephritis	1	0.0850551
bicalutamide	Urinary-Retention	2	0.0751893
bicalutamide	Nephrotic-Syndrome	3	0.0732121
bicalutamide	Infertility-Male	4	0.0588509
bicalutamide	Kidney-Failure-Chronic	5	0.0539379
bicalutamide	Trichomonas-Vaginitis	6	0.0530397
bicalutamide	Epididymitis	7	0.0467326
bicalutamide	Melanoma	8	0.0457088
bicalutamide	Impotence-Vasculogenic	9	0.0444305
bicalutamide	Diabetic-Nephropathies	10	0.0436587
bimatoprost	Conjunctivitis	1	0.15309
bimatoprost	Glaucoma	2	0.114753
bimatoprost	Scleritis	3	0.114355
bimatoprost	Uveitis-Anterior	4	0.113167
bimatoprost	Iridocyclitis	5	0.108898
bimatoprost	Uveitis	6	0.108179
bimatoprost	Blepharospasm	7	0.105583
bimatoprost	Ocular-Hypertension	8	0.0979018
bimatoprost	Glaucoma-Angle-Closure	9	0.095918
bimatoprost	Eye-Diseases	10	0.0912648
biperiden	Bites-Human	1	0.128753
biperiden	Poisoning	2	0.123371
biperiden	Drug-Hypersensitivity	3	0.119856
biperiden	Alcohol-Withdrawal-Delirium	4	0.0666436
biperiden	Intracranial-Hypertension	5	0.0572735
biperiden	Alcohol-Induced-Disorders-Nervous-System	6	0.0547835
biperiden	Epilepsy	7	0.0514185
biperiden	Epilepsies-Partial	8	0.0469744
biperiden	Myositis	9	0.044951
biperiden	Neuroleptic-Malignant-Syndrome	10	0.0449424
bismuth-subsalicylate	Dysentery	1	0.385702
bismuth-subsalicylate	Gram-Negative-Bacterial-Infections	2	0.150487
bismuth-subsalicylate	Esophagitis-Peptic	3	0.122707
bismuth-subsalicylate	Stomach-Ulcer	4	0.10911
bismuth-subsalicylate	Hepatitis-B	5	0.107357
bismuth-subsalicylate	Proctitis	6	0.0941333
bismuth-subsalicylate	Herpes-Zoster	7	0.0901595
bismuth-subsalicylate	Sigmoid-Diseases	8	0.0879298
bismuth-subsalicylate	Respiratory-Syncytial-Virus-Infections	9	0.0843612
bismuth-subsalicylate	Hepatitis-C-Chronic	10	0.0817985
bisoprolol	Coronary-Artery-Disease	1	0.216916
bisoprolol	Hypotension	2	0.213999
bisoprolol	Angina-Unstable	3	0.203038
bisoprolol	Thromboembolism	4	0.202374
bisoprolol	Raynaud-Disease	5	0.200468
bisoprolol	Aortic-Aneurysm	6	0.198079
bisoprolol	Hypertension-Malignant	7	0.196509
bisoprolol	Thrombophlebitis	8	0.190792
bisoprolol	Heart-Arrest	9	0.186388
bisoprolol	Arterial-Occlusive-Diseases	10	0.185948
bleomycin	Hypereosinophilic-Syndrome	1	0.282488
bleomycin	Thrombocytopenia	2	0.265505
bleomycin	Anemia-Megaloblastic	3	0.261707
bleomycin	Glioblastoma	4	0.247667
bleomycin	Leukemia-Myeloid-Acute	5	0.238089
bleomycin	Neoplasms	6	0.236215
bleomycin	Paget-Disease-Extramammary	7	0.222649
bleomycin	Pancreatic-Neoplasms	8	0.222362
bleomycin	Polycythemia-Vera	9	0.221935
bleomycin	Carcinoma-Small-Cell	10	0.21845
bortezomib	Thrombocythemia-Essential	1	0.170009
bortezomib	Hematologic-Diseases	2	0.163497
bortezomib	Hypereosinophilic-Syndrome	3	0.161867
bortezomib	Blood-Coagulation-Disorders	4	0.157455
bortezomib	Polycythemia-Vera	5	0.144289
bortezomib	Elephantiasis	6	0.122097
bortezomib	Thrombocytopenia	7	0.113322
bortezomib	Neutropenia	8	0.107069
bortezomib	Anemia-Megaloblastic	9	0.100529
bortezomib	Hypersensitivity	10	0.0967666
bosentan	Pulmonary-Edema	1	0.0574923
bosentan	Pleural-Effusion	2	0.0534798
bosentan	Altitude-Sickness	3	0.0498761
bosentan	Status-Asthmaticus	4	0.0497185
bosentan	Asthma	5	0.0486638
bosentan	Bronchial-Spasm	6	0.0441776
bosentan	Hypersensitivity	7	0.0403665
bosentan	Respiratory-Distress-Syndrome-Adult	8	0.0395361
bosentan	Respiratory-Distress-Syndrome-Newborn	9	0.0338919
bosentan	Pulmonary-Emphysema	10	0.0304751
bretylium	Myocardial-Infarction	1	0.124362
bretylium	Arteriosclerosis-Obliterans	2	0.0879411
bretylium	Hypertension-Malignant	3	0.0843572
bretylium	Ventricular-Dysfunction	4	0.0838645
bretylium	Arterial-Occlusive-Diseases	5	0.0834382
bretylium	Postoperative-Complications	6	0.0779595
bretylium	Vomiting	7	0.0778145
bretylium	Pulmonary-Valve-Stenosis	8	0.0767974
bretylium	Anorexia	9	0.0765885
bretylium	Heart-Arrest	10	0.0747448
brimonidine	Glaucoma	1	0.370276
brimonidine	Ocular-Hypertension	2	0.318324
brimonidine	Glaucoma-Angle-Closure	3	0.129014
brimonidine	Keratitis	4	0.116863
brimonidine	Blepharospasm	5	0.110239
brimonidine	Uveitis	6	0.109069
brimonidine	Macular-Edema	7	0.107817
brimonidine	Scleritis	8	0.102706
brimonidine	Eye-Diseases	9	0.0868487
brimonidine	Uveitis-Anterior	10	0.0739867
brinzolamide	Iritis	1	0.200401
brinzolamide	Ocular-Hypertension	2	0.13
brinzolamide	Uveitis-Anterior	3	0.111198
brinzolamide	Scleritis	4	0.109375
brinzolamide	Iridocyclitis	5	0.104226
brinzolamide	Glaucoma-Angle-Closure	6	0.0946332
brinzolamide	Keratitis	7	0.0814221
brinzolamide	Glaucoma	8	0.0773636
brinzolamide	Macular-Edema	9	0.0749216
brinzolamide	Uveitis	10	0.0748934
bromfenac	Head-Injuries-Closed	1	0.0533558
bromfenac	Cluster-Headache	2	0.0526572
bromfenac	Status-Epilepticus	3	0.051021
bromfenac	Neuroleptic-Malignant-Syndrome	4	0.0494591
bromfenac	Osteolysis	5	0.0478403
bromfenac	Trigeminal-Neuralgia	6	0.0466808
bromfenac	Myositis	7	0.0428003
bromfenac	Amyotrophic-Lateral-Sclerosis	8	0.0416212
bromfenac	Postoperative-Nausea-and-Vomiting	9	0.0399276
bromfenac	Essential-Tremor	10	0.0384793
bromocriptine	Goiter	1	0.318725
bromocriptine	Cushing-Syndrome	2	0.306196
bromocriptine	Drug-Toxicity	3	0.295615
bromocriptine	Puberty-Precocious	4	0.277212
bromocriptine	Hyperparathyroidism	5	0.245968
bromocriptine	Epilepsy	6	0.23528
bromocriptine	Adrenal-Insufficiency	7	0.219841
bromocriptine	Puberty-Delayed	8	0.218886
bromocriptine	Hyperaldosteronism	9	0.217045
bromocriptine	Epilepsy-Benign-Neonatal	10	0.211988
bromodiphenhydramine	Otitis-Externa	1	0.196665
bromodiphenhydramine	Obsessive-Compulsive-Disorder	2	0.189797
bromodiphenhydramine	Depressive-Disorder	3	0.173711
bromodiphenhydramine	Conduct-Disorder	4	0.138982
bromodiphenhydramine	Purpura-Thrombocytopenic-Idiopathic	5	0.13747
bromodiphenhydramine	Attention-Deficit-Disorder-with-Hyperactivity	6	0.137057
bromodiphenhydramine	Respiratory-Tract-Fistula	7	0.133426
bromodiphenhydramine	Panic-Disorder	8	0.130974
bromodiphenhydramine	Graft-vs-Host-Disease	9	0.127713
bromodiphenhydramine	Emaciation	10	0.126474
brompheniramine	Otitis-Media	1	0.268103
brompheniramine	Ear-Diseases	2	0.211308
brompheniramine	Otitis-Externa	3	0.178796
brompheniramine	Pleural-Effusion	4	0.13174
brompheniramine	Respiratory-Distress-Syndrome-Newborn	5	0.105669
brompheniramine	Persistent-Fetal-Circulation-Syndrome	6	0.104614
brompheniramine	Hypertension-Pulmonary	7	0.0994566
brompheniramine	Altitude-Sickness	8	0.0983906
brompheniramine	Pulmonary-Emphysema	9	0.0980062
brompheniramine	Airway-Obstruction	10	0.0973423
buclizine	Motion-Sickness	1	0.117625
buclizine	Fever	2	0.116521
buclizine	Diarrhea	3	0.114382
buclizine	Emaciation	4	0.114107
buclizine	Heartburn	5	0.112575
buclizine	Intraoperative-Complications	6	0.106902
buclizine	Hemorrhage	7	0.106693
buclizine	Graft-Occlusion-Vascular	8	0.104917
buclizine	Hiccup	9	0.104037
buclizine	Dyspepsia	10	0.103158
budesonide	Respiratory-Distress-Syndrome-Newborn	1	0.138856
budesonide	Respiration-Disorders	2	0.132222
budesonide	Anaphylaxis	3	0.12876
budesonide	Drug-Hypersensitivity	4	0.122391
budesonide	Pleural-Effusion	5	0.115855
budesonide	Hypertension-Pulmonary	6	0.115176
budesonide	Food-Hypersensitivity	7	0.108792
budesonide	Conjunctivitis-Allergic	8	0.108752
budesonide	Bronchial-Spasm	9	0.108701
budesonide	Graft-vs-Host-Disease	10	0.107133
bumetanide	Prostatitis	1	0.195036
bumetanide	Infertility	2	0.1919
bumetanide	Prostatic-Hyperplasia	3	0.180058
bumetanide	Epididymitis	4	0.171514
bumetanide	Pyelonephritis	5	0.160277
bumetanide	Urethritis	6	0.155812
bumetanide	Eclampsia	7	0.153382
bumetanide	Pregnancy-Ectopic	8	0.142164
bumetanide	Uterine-Hemorrhage	9	0.138298
bumetanide	Erectile-Dysfunction	10	0.133697
bupivacaine	Epilepsy-Tonic-Clonic	1	0.0692401
bupivacaine	Parkinson-Disease	2	0.0683718
bupivacaine	Spasms-Infantile	3	0.05889
bupivacaine	Brain-Edema	4	0.0587632
bupivacaine	Status-Epilepticus	5	0.0509857
bupivacaine	Hyperprolactinemia	6	0.0505473
bupivacaine	Osteolysis	7	0.0472126
bupivacaine	Cluster-Headache	8	0.045142
bupivacaine	Inflammation	9	0.0392123
bupivacaine	Gangrene	10	0.0358554
bupropion	Attention-Deficit-and-Disruptive-Behavior-Disorders	1	0.265458
bupropion	Substance-Withdrawal-Syndrome	2	0.204469
bupropion	Eating-Disorders	3	0.197092
bupropion	Stress-Disorders-Post-Traumatic	4	0.195882
bupropion	Panic-Disorder	5	0.189657
bupropion	Schizophrenia	6	0.188948
bupropion	Psychotic-Disorders	7	0.187279
bupropion	Phobic-Disorders	8	0.183811
bupropion	Autistic-Disorder	9	0.178947
bupropion	Obsessive-Compulsive-Disorder	10	0.176518
buspirone	Substance-Withdrawal-Syndrome	1	0.223787
buspirone	Attention-Deficit-and-Disruptive-Behavior-Disorders	2	0.21697
buspirone	Schizophrenia-Paranoid	3	0.197048
buspirone	Eating-Disorders	4	0.196939
buspirone	Tobacco-Use-Disorder	5	0.190571
buspirone	Child-Behavior-Disorders	6	0.169869
buspirone	Attention-Deficit-Disorder-with-Hyperactivity	7	0.158576
buspirone	Cocaine-Related-Disorders	8	0.156695
buspirone	Bipolar-Disorder	9	0.150367
buspirone	Phobic-Disorders	10	0.148094
butenafine	Facial-Dermatoses	1	0.131877
butenafine	Acne-Vulgaris	2	0.112518
butenafine	Scalp-Dermatoses	3	0.101811
butenafine	Lupus-Erythematosus-Discoid	4	0.0849886
butenafine	Scleroderma-Systemic	5	0.0804587
butenafine	Breast-Neoplasms	6	0.079614
butenafine	Dermatitis-Allergic-Contact	7	0.0793435
butenafine	Epidermolysis-Bullosa	8	0.0745271
butenafine	Arthritis-Rheumatoid	9	0.0741884
butenafine	Eczema	10	0.0735269
cabergoline	Cerebral-Palsy	1	0.113477
cabergoline	Cluster-Headache	2	0.113284
cabergoline	Essential-Tremor	3	0.110171
cabergoline	Parkinson-Disease-Postencephalitic	4	0.109249
cabergoline	Epilepsy-Complex-Partial	5	0.0996752
cabergoline	Thyrotoxicosis	6	0.0936078
cabergoline	Head-Injuries-Closed	7	0.0929944
cabergoline	Trigeminal-Neuralgia	8	0.0900088
cabergoline	Brain-Edema	9	0.0891355
cabergoline	Hyperaldosteronism	10	0.0875404
caffeine	Respiratory-Distress-Syndrome-Adult	1	0.0569526
caffeine	Pulmonary-Edema	2	0.055174
caffeine	Pulmonary-Emphysema	3	0.0540063
caffeine	Altitude-Sickness	4	0.0513289
caffeine	Persistent-Fetal-Circulation-Syndrome	5	0.0504992
caffeine	Respiration-Disorders	6	0.0480525
caffeine	Bronchial-Spasm	7	0.0450822
caffeine	Hypertension-Pulmonary	8	0.0442195
caffeine	Respiratory-Tract-Diseases	9	0.0437687
caffeine	Amenorrhea	10	0.0385446
candesartan	Ventricular-Dysfunction	1	0.145759
candesartan	Vasculitis	2	0.129103
candesartan	Hypotension	3	0.127829
candesartan	Aortic-Aneurysm	4	0.126954
candesartan	Pulmonary-Valve-Stenosis	5	0.125993
candesartan	Ductus-Arteriosus-Patent	6	0.1259
candesartan	Venous-Thrombosis	7	0.109887
candesartan	Pulmonary-Embolism	8	0.106897
candesartan	Hypoplastic-Left-Heart-Syndrome	9	0.10508
candesartan	Endocarditis	10	0.10429
capecitabine	Rectal-Neoplasms	1	0.367613
capecitabine	Colonic-Neoplasms	2	0.358802
capecitabine	Colonic-Diseases	3	0.234571
capecitabine	Gastrointestinal-Neoplasms	4	0.145887
capecitabine	Gastrointestinal-Diseases	5	0.116371
capecitabine	Proctitis	6	0.111008
capecitabine	Gastroenteritis	7	0.111003
capecitabine	Melanoma	8	0.0974657
capecitabine	Esophageal-and-Gastric-Varices	9	0.0897308
capecitabine	Irritable-Bowel-Syndrome	10	0.0889112
captopril	Hypertriglyceridemia	1	0.25372
captopril	Hypercholesterolemia	2	0.242427
captopril	Hyperlipoproteinemias	3	0.208378
captopril	Magnesium-Deficiency	4	0.203359
captopril	Abnormalities-Drug-Induced	5	0.199281
captopril	Hypocalcemia	6	0.193219
captopril	Thyrotoxicosis	7	0.192903
captopril	Hyperparathyroidism	8	0.17912
captopril	Hypercalcemia	9	0.176084
captopril	Amyloidosis	10	0.172619
carbachol	Keratitis	1	0.211806
carbachol	Glaucoma-Open-Angle	2	0.145052
carbachol	Blepharospasm	3	0.121378
carbachol	Uveitis-Anterior	4	0.117293
carbachol	Iritis	5	0.111975
carbachol	Scleritis	6	0.111503
carbachol	Macular-Edema	7	0.111017
carbachol	Conjunctivitis	8	0.108526
carbachol	Iridocyclitis	9	0.107562
carbachol	Ocular-Hypertension	10	0.104393
carbamazepine	Autistic-Disorder	1	0.359892
carbamazepine	Child-Behavior-Disorders	2	0.346586
carbamazepine	Substance-Related-Disorders	3	0.343839
carbamazepine	Alcoholism	4	0.338247
carbamazepine	Eating-Disorders	5	0.338059
carbamazepine	Conduct-Disorder	6	0.337221
carbamazepine	Alzheimer-Disease	7	0.320155
carbamazepine	Cocaine-Related-Disorders	8	0.316174
carbamazepine	Schizophrenia-Paranoid	9	0.315551
carbamazepine	Opioid-Related-Disorders	10	0.301555
carbidopa	Epilepsies-Partial	1	0.0740261
carbidopa	Intracranial-Hypertension	2	0.0581886
carbidopa	Parkinsonian-Disorders	3	0.0521234
carbidopa	Strabismus	4	0.0470889
carbidopa	Amyotrophic-Lateral-Sclerosis	5	0.0386337
carbidopa	Essential-Tremor	6	0.0362094
carbidopa	Complex-Regional-Pain-Syndromes	7	0.0352751
carbidopa	Epilepsy-Post-Traumatic	8	0.0350687
carbidopa	Obsessive-Compulsive-Disorder	9	0.0341451
carbidopa	Hyperprolactinemia	10	0.0338007
carbinoxamine	Otitis-Media	1	0.182975
carbinoxamine	Ear-Diseases	2	0.168309
carbinoxamine	Altitude-Sickness	3	0.150644
carbinoxamine	Respiratory-Distress-Syndrome-Adult	4	0.141819
carbinoxamine	Gastroesophageal-Reflux	5	0.140647
carbinoxamine	Respiratory-Tract-Diseases	6	0.132931
carbinoxamine	Respiration-Disorders	7	0.130344
carbinoxamine	Bronchial-Spasm	8	0.108807
carbinoxamine	Pulmonary-Edema	9	0.105029
carbinoxamine	Pleural-Effusion	10	0.104511
carmustine	Lymphoma	1	0.576429
carmustine	Leukemia-Myeloid-Acute	2	0.423178
carmustine	Esophageal-Neoplasms	3	0.417143
carmustine	Neoplasms	4	0.412818
carmustine	Soft-Tissue-Neoplasms	5	0.411091
carmustine	Carcinoma-Squamous-Cell	6	0.404545
carmustine	Mesothelioma	7	0.401755
carmustine	Carcinoma-Small-Cell	8	0.401276
carmustine	Sarcoma	9	0.397113
carmustine	Gastrointestinal-Neoplasms	10	0.39205
carnitine	Hypocalcemia	1	0.164218
carnitine	Hyperlipoproteinemias	2	0.10263
carnitine	Hypoglycemia	3	0.0998937
carnitine	Cystinosis	4	0.0956434
carnitine	Hypertriglyceridemia	5	0.0907476
carnitine	Hyperlipoproteinemia-Type-II	6	0.0889423
carnitine	Hypercalcemia	7	0.0813178
carnitine	Amyloidosis	8	0.0808871
carnitine	Folic-Acid-Deficiency	9	0.0779126
carnitine	Magnesium-Deficiency	10	0.0663933
carteolol	Iridocyclitis	1	0.151609
carteolol	Scleritis	2	0.145281
carteolol	Glaucoma	3	0.110656
carteolol	Conjunctivitis	4	0.110044
carteolol	Iritis	5	0.109071
carteolol	Macular-Edema	6	0.104188
carteolol	Ocular-Hypertension	7	0.0996682
carteolol	Glaucoma-Angle-Closure	8	0.099111
carteolol	Uveitis	9	0.0953731
carteolol	Heart-Failure	10	0.0863163
carvedilol	Coronary-Artery-Disease	1	0.198633
carvedilol	Arteriosclerosis-Obliterans	2	0.16328
carvedilol	Heart-Arrest	3	0.162401
carvedilol	Vasculitis	4	0.154026
carvedilol	Hemorrhoids	5	0.147011
carvedilol	Thromboangiitis-Obliterans	6	0.145357
carvedilol	Pulmonary-Valve-Stenosis	7	0.144971
carvedilol	Varicose-Veins	8	0.138553
carvedilol	Thromboembolism	9	0.13695
carvedilol	Ventricular-Dysfunction	10	0.129529
cefaclor	Pulmonary-Edema	1	0.234653
cefaclor	Typhoid-Fever	2	0.210068
cefaclor	Tonsillitis	3	0.208685
cefaclor	Nocardia-Infections	4	0.206134
cefaclor	Osteomyelitis	5	0.205254
cefaclor	Blastomycosis	6	0.203599
cefaclor	Leprosy-Lepromatous	7	0.202391
cefaclor	Bacteroides-Infections	8	0.202237
cefaclor	Otitis-Externa	9	0.199738
cefaclor	Leishmaniasis-Visceral	10	0.199169
cefadroxil	Sialorrhea	1	0.241034
cefadroxil	Mouth-Diseases	2	0.227021
cefadroxil	Otitis-Media	3	0.210672
cefadroxil	Xerostomia	4	0.164665
cefadroxil	Oral-Ulcer	5	0.118957
cefadroxil	Gram-Positive-Bacterial-Infections	6	0.113508
cefadroxil	Mycoplasma-Infections	7	0.111736
cefadroxil	Staphylococcal-Infections	8	0.108502
cefadroxil	Mycobacterium-avium-intracellulare-Infection	9	0.105743
cefadroxil	Corneal-Ulcer	10	0.105121
cefamandole	Osteomyelitis	1	0.475801
cefamandole	Coccidioidomycosis	2	0.177895
cefamandole	Helicobacter-Infections	3	0.173807
cefamandole	Mycobacterium-Infections	4	0.171672
cefamandole	Onychomycosis	5	0.170326
cefamandole	Mycobacterium-Infections-Atypical	6	0.169361
cefamandole	Meningococcal-Infections	7	0.167993
cefamandole	Herpes-Zoster-Ophthalmicus	8	0.167155
cefamandole	Corneal-Ulcer	9	0.166558
cefamandole	Pneumonia-Pneumocystis	10	0.166493
cefazolin	Endocarditis-Subacute-Bacterial	1	0.428446
cefazolin	Burns	2	0.198819
cefazolin	Gram-Negative-Bacterial-Infections	3	0.168808
cefazolin	Plague	4	0.160895
cefazolin	Candidiasis	5	0.157154
cefazolin	Acinetobacter-Infections	6	0.157078
cefazolin	Leprosy-Lepromatous	7	0.156703
cefazolin	Pneumonia-Pneumococcal	8	0.155713
cefazolin	Wound-Infection	9	0.154149
cefazolin	Rhinitis-Vasomotor	10	0.152494
cefdinir	Ear-Diseases	1	0.355054
cefdinir	Otitis-Externa	2	0.281755
cefdinir	Respiration-Disorders	3	0.276746
cefdinir	Pulmonary-Emphysema	4	0.237723
cefdinir	Respiratory-Distress-Syndrome-Adult	5	0.23711
cefdinir	Pleural-Effusion	6	0.234707
cefdinir	Bronchial-Spasm	7	0.233289
cefdinir	Rhinitis-Allergic-Perennial	8	0.218899
cefdinir	Persistent-Fetal-Circulation-Syndrome	9	0.209422
cefdinir	Altitude-Sickness	10	0.208473
cefditoren	Sialorrhea	1	0.217774
cefditoren	Pulmonary-Edema	2	0.217428
cefditoren	Persistent-Fetal-Circulation-Syndrome	3	0.191958
cefditoren	Respiratory-Tract-Diseases	4	0.185488
cefditoren	Pulmonary-Emphysema	5	0.183723
cefditoren	Hypertension-Pulmonary	6	0.181626
cefditoren	Xerostomia	7	0.172777
cefditoren	Oral-Ulcer	8	0.171703
cefditoren	Altitude-Sickness	9	0.170397
cefditoren	Bronchial-Spasm	10	0.162253
cefepime	Salmonella-Infections	1	0.273719
cefepime	Bronchitis	2	0.266578
cefepime	Shock-Septic	3	0.263939
cefepime	Pneumococcal-Infections	4	0.252778
cefepime	Mycoplasma-Infections	5	0.239475
cefepime	Lung-Diseases-Fungal	6	0.236708
cefepime	Impetigo	7	0.236237
cefepime	Acquired-Immunodeficiency-Syndrome	8	0.23572
cefepime	Respiratory-Tract-Infections	9	0.23543
cefepime	Listeriosis	10	0.230474
cefixime	Neisseriaceae-Infections	1	0.194966
cefixime	Tinea-Versicolor	2	0.194468
cefixime	Meningococcal-Infections	3	0.188922
cefixime	Onychomycosis	4	0.188492
cefixime	Legionnaires-Disease	5	0.178189
cefixime	Acinetobacter-Infections	6	0.177904
cefixime	Bacteroides-Infections	7	0.177695
cefixime	Meningitis-Cryptococcal	8	0.176234
cefixime	Pharyngitis	9	0.175455
cefixime	Community-Acquired-Infections	10	0.175182
cefoperazone	Rhinitis-Allergic-Perennial	1	0.252168
cefoperazone	Candidiasis-Vulvovaginal	2	0.245134
cefoperazone	Enterobacteriaceae-Infections	3	0.24021
cefoperazone	Spirochaetales-Infections	4	0.230787
cefoperazone	Candidiasis	5	0.224023
cefoperazone	Sinusitis	6	0.220832
cefoperazone	Conjunctivitis-Viral	7	0.210361
cefoperazone	Plague	8	0.209974
cefoperazone	Keratitis-Herpetic	9	0.209762
cefoperazone	Mycobacterium-Infections	10	0.208221
cefotaxime	Enterobacteriaceae-Infections	1	0.378348
cefotaxime	Actinomycetales-Infections	2	0.286832
cefotaxime	Coccidioidomycosis	3	0.28466
cefotaxime	Candidiasis-Cutaneous	4	0.284048
cefotaxime	Onychomycosis	5	0.281122
cefotaxime	Pneumonia-Pneumococcal	6	0.281063
cefotaxime	Actinomycosis	7	0.280062
cefotaxime	Maxillary-Sinusitis	8	0.277883
cefotaxime	Wound-Infection	9	0.27346
cefotaxime	Aspergillosis	10	0.272915
cefotetan	Abdominal-Abscess	1	0.542396
cefotetan	Burns	2	0.489266
cefotetan	Radiation-Injuries-Experimental	3	0.289863
cefotetan	Sepsis	4	0.289685
cefotetan	Serratia-Infections	5	0.277666
cefotetan	Tularemia	6	0.275775
cefotetan	Trachoma	7	0.27162
cefotetan	Conjunctivitis-Bacterial	8	0.26877
cefotetan	Leishmaniasis	9	0.266062
cefotetan	Clostridium-Infections	10	0.262992
cefoxitin	Mycobacterium-avium-intracellulare-Infection	1	0.275067
cefoxitin	Coccidioidomycosis	2	0.270964
cefoxitin	Campylobacter-Infections	3	0.264992
cefoxitin	Actinomycetales-Infections	4	0.263893
cefoxitin	Pneumonia	5	0.262242
cefoxitin	Chlamydiaceae-Infections	6	0.261863
cefoxitin	Pneumococcal-Infections	7	0.259748
cefoxitin	Rickettsia-Infections	8	0.257878
cefoxitin	Leprosy-Lepromatous	9	0.257069
cefoxitin	Sporotrichosis	10	0.255679
cefpodoxime	Xerostomia	1	0.273489
cefpodoxime	Mouth-Diseases	2	0.232817
cefpodoxime	Hypertension-Pulmonary	3	0.229301
cefpodoxime	Altitude-Sickness	4	0.212393
cefpodoxime	Asthma	5	0.20186
cefpodoxime	Pharyngitis	6	0.195214
cefpodoxime	Chlamydia-Infections	7	0.191673
cefpodoxime	Osteomyelitis	8	0.191276
cefpodoxime	Candidiasis-Cutaneous	9	0.191147
cefpodoxime	Maxillary-Sinusitis	10	0.188733
cefprozil	Otitis-Externa	1	0.313939
cefprozil	Oral-Ulcer	2	0.243759
cefprozil	Gastroesophageal-Reflux	3	0.196492
cefprozil	Airway-Obstruction	4	0.193731
cefprozil	Esophageal-Spasm-Diffuse	5	0.187566
cefprozil	Respiratory-Tract-Diseases	6	0.18618
cefprozil	Pulmonary-Edema	7	0.181765
cefprozil	Pleural-Effusion	8	0.176259
cefprozil	Respiration-Disorders	9	0.175008
cefprozil	Pneumonia-Bacterial	10	0.159437
ceftazidime	Gonorrhea	1	0.261003
ceftazidime	Endocarditis-Bacterial	2	0.258198
ceftazidime	Coccidioidomycosis	3	0.253589
ceftazidime	Pneumonia-Pneumocystis	4	0.250674
ceftazidime	Neisseriaceae-Infections	5	0.247538
ceftazidime	Helicobacter-Infections	6	0.2471
ceftazidime	Conjunctivitis-Bacterial	7	0.244422
ceftazidime	Bacterial-Infections	8	0.243536
ceftazidime	Otitis-Media-Suppurative	9	0.242962
ceftazidime	Keratoconjunctivitis-Infectious	10	0.242754
ceftibuten	Otitis-Externa	1	0.17847
ceftibuten	Xerostomia	2	0.173633
ceftibuten	Bronchial-Spasm	3	0.133925
ceftibuten	Gastroesophageal-Reflux	4	0.1298
ceftibuten	Pulmonary-Emphysema	5	0.122414
ceftibuten	Oral-Ulcer	6	0.119073
ceftibuten	Sialorrhea	7	0.118129
ceftibuten	Mouth-Diseases	8	0.117796
ceftibuten	Airway-Obstruction	9	0.116033
ceftibuten	Pulmonary-Edema	10	0.106426
ceftizoxime	Rhinitis-Allergic-Perennial	1	0.263591
ceftizoxime	Tetanus	2	0.254986
ceftizoxime	Plague	3	0.247598
ceftizoxime	Anthrax	4	0.24432
ceftizoxime	Eye-Infections-Bacterial	5	0.241806
ceftizoxime	Septicemia	6	0.240273
ceftizoxime	Mycoplasma-Infections	7	0.240114
ceftizoxime	Zygomycosis	8	0.23883
ceftizoxime	Leishmaniasis-Visceral	9	0.238095
ceftizoxime	Osteomyelitis	10	0.234983
ceftriaxone	Bone-Diseases-Infectious	1	0.302246
ceftriaxone	Panic-Disorder	2	0.298775
ceftriaxone	Hepatitis-B	3	0.284762
ceftriaxone	Respiratory-Syncytial-Virus-Infections	4	0.279499
ceftriaxone	Maxillary-Sinusitis	5	0.27944
ceftriaxone	Tetanus	6	0.27305
ceftriaxone	Legionnaires-Disease	7	0.270609
ceftriaxone	Cytomegalovirus-Infections	8	0.269495
ceftriaxone	Respiration-Disorders	9	0.268398
ceftriaxone	Respiratory-Distress-Syndrome-Adult	10	0.265665
cefuroxime	Otitis-Externa	1	0.312555
cefuroxime	Otitis-Media	2	0.271435
cefuroxime	Bacteroides-Infections	3	0.232349
cefuroxime	Nocardia-Infections	4	0.225883
cefuroxime	Rhinitis-Allergic-Perennial	5	0.216802
cefuroxime	Cytomegalovirus-Infections	6	0.214307
cefuroxime	Conjunctivitis-Acute-Hemorrhagic	7	0.213404
cefuroxime	Tetanus	8	0.211581
cefuroxime	Eye-Infections-Bacterial	9	0.210512
cefuroxime	Staphylococcal-Infections	10	0.209918
celecoxib	Abnormalities-Drug-Induced	1	0.274126
celecoxib	Arthritis	2	0.19927
celecoxib	Bursitis	3	0.185066
celecoxib	Joint-Diseases	4	0.156352
celecoxib	Infant-Premature-Diseases	5	0.137285
celecoxib	Stomach-Ulcer	6	0.131465
celecoxib	Osteolysis	7	0.130957
celecoxib	Scalp-Dermatoses	8	0.130577
celecoxib	Osteoporosis-Postmenopausal	9	0.126927
celecoxib	Proctitis	10	0.126892
cephalexin	Pneumonia-Mycoplasma	1	0.42696
cephalexin	Burns	2	0.313304
cephalexin	Tonsillitis	3	0.300303
cephalexin	Respiratory-Tract-Infections	4	0.253068
cephalexin	Sialorrhea	5	0.250168
cephalexin	Pneumonia	6	0.246532
cephalexin	Pneumonia-Pneumococcal	7	0.215755
cephalexin	Drug-Toxicity	8	0.209282
cephalexin	Oral-Ulcer	9	0.178571
cephalexin	Staphylococcal-Skin-Infections	10	0.177683
cephalothin	Chlamydiaceae-Infections	1	0.150037
cephalothin	Clostridium-Infections	2	0.146782
cephalothin	Whooping-Cough	3	0.140375
cephalothin	Tetanus	4	0.137223
cephalothin	Rhinitis-Vasomotor	5	0.136288
cephalothin	Rickettsia-Infections	6	0.136139
cephalothin	Pneumonia	7	0.135006
cephalothin	Candidiasis-Vulvovaginal	8	0.13443
cephalothin	Osteomyelitis	9	0.133617
cephalothin	Peritonitis	10	0.132119
cephapirin	Lung-Diseases-Fungal	1	0.153812
cephapirin	Bacterial-Infections	2	0.147847
cephapirin	Gram-Positive-Bacterial-Infections	3	0.14663
cephapirin	Typhoid-Fever	4	0.14633
cephapirin	Actinomycetales-Infections	5	0.145843
cephapirin	Eye-Infections-Bacterial	6	0.142946
cephapirin	Rhinitis-Allergic-Perennial	7	0.141072
cephapirin	Clostridium-Infections	8	0.139964
cephapirin	Candidiasis-Vulvovaginal	9	0.139153
cephapirin	Paracoccidioidomycosis	10	0.138862
cephradine	Enterobacteriaceae-Infections	1	0.266336
cephradine	Dysentery-Bacillary	2	0.145154
cephradine	Clostridium-Infections	3	0.144299
cephradine	Sporotrichosis	4	0.140911
cephradine	Syphilis	5	0.136367
cephradine	Rheumatic-Fever	6	0.134253
cephradine	Legionnaires-Disease	7	0.134004
cephradine	Meningitis-Meningococcal	8	0.131495
cephradine	Salmonella-Infections	9	0.130721
cephradine	Bronchitis	10	0.130456
cetirizine	Graft-vs-Host-Disease	1	0.14682
cetirizine	Hypersensitivity	2	0.125804
cetirizine	Status-Asthmaticus	3	0.119801
cetirizine	Autoimmune-Diseases	4	0.117737
cetirizine	Food-Hypersensitivity	5	0.111396
cetirizine	Otitis-Externa	6	0.104943
cetirizine	Drug-Hypersensitivity	7	0.100052
cetirizine	Anaphylaxis	8	0.0957951
cetirizine	Thyroiditis-Autoimmune	9	0.0948565
cetirizine	Ear-Diseases	10	0.0937904
cevimeline	Mouth-Diseases	1	0.256309
cevimeline	Oral-Ulcer	2	0.172049
cevimeline	Sialorrhea	3	0.14113
cevimeline	Esophageal-Spasm-Diffuse	4	0.0506067
cevimeline	Gastroesophageal-Reflux	5	0.0412106
cevimeline	Bursitis	6	0.0298906
cevimeline	Radiation-Injuries-Experimental	7	0.0216874
cevimeline	Arthritis	8	0.0188753
cevimeline	Infant-Premature-Diseases	9	0.0150153
cevimeline	Mesothelioma	10	0.0143844
chloramphenicol	Pneumococcal-Infections	1	0.369367
chloramphenicol	Impetigo	2	0.125247
chloramphenicol	Macular-Edema	3	0.122568
chloramphenicol	Peritonitis	4	0.114902
chloramphenicol	Glaucoma	5	0.114152
chloramphenicol	Maxillary-Sinusitis	6	0.110261
chloramphenicol	Iritis	7	0.108882
chloramphenicol	Candidiasis-Chronic-Mucocutaneous	8	0.107998
chloramphenicol	Candidiasis-Cutaneous	9	0.106477
chloramphenicol	Corneal-Ulcer	10	0.106246
chloroprocaine	Causalgia	1	0.133179
chloroprocaine	Pain-Postoperative	2	0.122629
chloroprocaine	Low-Back-Pain	3	0.117572
chloroprocaine	Flank-Pain	4	0.109506
chloroprocaine	Headache	5	0.107504
chloroprocaine	Dysmenorrhea	6	0.10355
chloroprocaine	Toothache	7	0.0904561
chloroprocaine	Facial-Pain	8	0.0890308
chloroprocaine	Pain-Intractable	9	0.0829235
chloroprocaine	Status-Epilepticus	10	0.0780508
chloroquine	Enterobiasis	1	0.356522
chloroquine	Trichinellosis	2	0.309833
chloroquine	Toxocariasis	3	0.267899
chloroquine	Necatoriasis	4	0.261734
chloroquine	Trypanosomiasis	5	0.236551
chloroquine	Mansonelliasis	6	0.219966
chloroquine	Clonorchiasis	7	0.212372
chloroquine	Dracunculiasis	8	0.206273
chloroquine	Leg-Dermatoses	9	0.190785
chloroquine	Ascariasis	10	0.185361
chlorothiazide	Atrial-Flutter	1	0.102749
chlorothiazide	Myocardial-Infarction	2	0.100423
chlorothiazide	Pre-Eclampsia	3	0.085858
chlorothiazide	Tachycardia-Paroxysmal	4	0.0843093
chlorothiazide	Hypotension	5	0.0840636
chlorothiazide	Coronary-Artery-Disease	6	0.0809297
chlorothiazide	Arrhythmias-Cardiac	7	0.0795328
chlorothiazide	Tachycardia-Atrioventricular-Nodal-Reentry	8	0.0791348
chlorothiazide	Thromboembolism	9	0.0788129
chlorothiazide	Vasculitis	10	0.0783473
chlorotrianisene	Adrenal-Insufficiency	1	0.222326
chlorotrianisene	Thyroid-Crisis	2	0.204834
chlorotrianisene	Goiter	3	0.177745
chlorotrianisene	Hyperaldosteronism	4	0.173902
chlorotrianisene	Thyrotoxicosis	5	0.14605
chlorotrianisene	Puberty-Precocious	6	0.145361
chlorotrianisene	Hyperparathyroidism	7	0.14319
chlorotrianisene	Adrenocortical-Hyperfunction	8	0.141605
chlorotrianisene	Puberty-Delayed	9	0.137692
chlorotrianisene	Diabetic-Nephropathies	10	0.136927
chlorpheniramine	Food-Hypersensitivity	1	0.221487
chlorpheniramine	Hypersensitivity	2	0.211934
chlorpheniramine	Addison-Disease	3	0.179015
chlorpheniramine	Status-Asthmaticus	4	0.174194
chlorpheniramine	Drug-Hypersensitivity	5	0.158985
chlorpheniramine	Graft-vs-Host-Disease	6	0.15799
chlorpheniramine	Anaphylaxis	7	0.15764
chlorpheniramine	Thyroiditis-Autoimmune	8	0.155327
chlorpheniramine	Autoimmune-Diseases	9	0.147037
chlorpheniramine	Conjunctivitis-Allergic	10	0.143718
chlorpromazine	Stress-Disorders-Post-Traumatic	1	0.312099
chlorpromazine	Conduct-Disorder	2	0.311165
chlorpromazine	Phobic-Disorders	3	0.266361
chlorpromazine	Cocaine-Related-Disorders	4	0.249621
chlorpromazine	Bipolar-Disorder	5	0.225807
chlorpromazine	Substance-Related-Disorders	6	0.224879
chlorpromazine	Obsessive-Compulsive-Disorder	7	0.215635
chlorpromazine	Substance-Withdrawal-Syndrome	8	0.201173
chlorpromazine	Sleep-Disorders	9	0.198387
chlorpromazine	Alcoholism	10	0.196034
chlorpropamide	Hypercholesterolemia	1	0.14181
chlorpropamide	Thyrotoxicosis	2	0.131574
chlorpropamide	Hyperlipoproteinemias	3	0.119067
chlorpropamide	Hypercalcemia	4	0.105799
chlorpropamide	Hypoglycemia	5	0.098034
chlorpropamide	Folic-Acid-Deficiency	6	0.0979342
chlorpropamide	Hypokalemia	7	0.0958099
chlorpropamide	Hyperaldosteronism	8	0.0937947
chlorpropamide	Nutritional-and-Metabolic-Diseases	9	0.0926549
chlorpropamide	Adrenal-Insufficiency	10	0.091079
chlorprothixene	Cocaine-Related-Disorders	1	0.135177
chlorprothixene	Anxiety-Disorders	2	0.129515
chlorprothixene	Attention-Deficit-Disorder-with-Hyperactivity	3	0.127898
chlorprothixene	Depressive-Disorder	4	0.118744
chlorprothixene	Substance-Withdrawal-Syndrome	5	0.0993426
chlorprothixene	Alcoholism	6	0.0977686
chlorprothixene	Panic-Disorder	7	0.0967774
chlorprothixene	Conduct-Disorder	8	0.0881297
chlorprothixene	Autistic-Disorder	9	0.0831877
chlorprothixene	Opioid-Related-Disorders	10	0.083005
chlorthalidone	Hypertension-Malignant	1	0.140478
chlorthalidone	Hypertension-Renovascular	2	0.137758
chlorthalidone	Atrial-Fibrillation	3	0.104559
chlorthalidone	Pre-Eclampsia	4	0.0935443
chlorthalidone	Hypotension	5	0.0924435
chlorthalidone	Aortic-Arch-Syndromes	6	0.0914148
chlorthalidone	Eclampsia	7	0.0884375
chlorthalidone	Cardiac-Output-Low	8	0.0883447
chlorthalidone	Endocarditis	9	0.0865345
chlorthalidone	Aortic-Coarctation	10	0.0836192
chlorzoxazone	Parkinson-Disease	1	0.271588
chlorzoxazone	Osteoporosis-Postmenopausal	2	0.271495
chlorzoxazone	Osteolysis	3	0.270429
chlorzoxazone	Complex-Regional-Pain-Syndromes	4	0.260567
chlorzoxazone	Status-Epilepticus	5	0.258955
chlorzoxazone	Epilepsy-Benign-Neonatal	6	0.25587
chlorzoxazone	Intracranial-Hypertension	7	0.254861
chlorzoxazone	Brain-Edema	8	0.244642
chlorzoxazone	Trigeminal-Neuralgia	9	0.24419
chlorzoxazone	Cluster-Headache	10	0.242533
ciclesonide	Status-Asthmaticus	1	0.258129
ciclesonide	Food-Hypersensitivity	2	0.073407
ciclesonide	Hypersensitivity	3	0.0727342
ciclesonide	Anaphylaxis	4	0.0604493
ciclesonide	Graft-vs-Host-Disease	5	0.0561586
ciclesonide	Pulmonary-Emphysema	6	0.0539086
ciclesonide	Altitude-Sickness	7	0.0524995
ciclesonide	Respiratory-Distress-Syndrome-Adult	8	0.0518202
ciclesonide	Airway-Obstruction	9	0.0508281
ciclesonide	Autoimmune-Diseases	10	0.0481383
cidofovir	Adenovirus-Infections-Human	1	0.186183
cidofovir	Necatoriasis	2	0.168168
cidofovir	Virus-Diseases	3	0.166006
cidofovir	Chickenpox	4	0.165925
cidofovir	Trichuriasis	5	0.165831
cidofovir	Herpes-Zoster	6	0.150904
cidofovir	Eye-Diseases	7	0.149687
cidofovir	Cytomegalovirus-Infections	8	0.126905
cidofovir	Glaucoma	9	0.111631
cidofovir	Hepatitis-C-Chronic	10	0.110233
cilastatin	Bipolar-Disorder	1	0.0287827
cilastatin	Soft-Tissue-Infections	2	0.0141191
cilastatin	Neisseriaceae-Infections	3	0.0101996
cilastatin	Radiation-Injuries-Experimental	4	0.0098895
cilastatin	Eye-Infections-Bacterial	5	0.00972794
cilastatin	Drug-Toxicity	6	0.00907687
cilastatin	Scalp-Dermatoses	7	0.00906621
cilastatin	Mouth-Diseases	8	0.00870399
cilastatin	Poisoning	9	0.00856779
cilastatin	Appendicitis	10	0.00851806
cilostazol	Thromboangiitis-Obliterans	1	0.105036
cilostazol	Endocarditis	2	0.086252
cilostazol	Arteriosclerosis	3	0.08614
cilostazol	Hypoplastic-Left-Heart-Syndrome	4	0.0821952
cilostazol	Heartburn	5	0.079298
cilostazol	Bradycardia	6	0.075315
cilostazol	Hiccup	7	0.07444
cilostazol	Hypotension-Orthostatic	8	0.0742541
cilostazol	Nausea	9	0.0738335
cilostazol	Arrhythmias-Cardiac	10	0.0735032
cimetidine	Esophageal-Diseases	1	0.40753
cimetidine	Sigmoid-Diseases	2	0.380788
cimetidine	Proctitis	3	0.371564
cimetidine	Colitis-Ulcerative	4	0.364014
cimetidine	Colonic-Diseases	5	0.35846
cimetidine	Esophageal-and-Gastric-Varices	6	0.353718
cimetidine	Irritable-Bowel-Syndrome	7	0.345678
cimetidine	Liver-Cirrhosis-Biliary	8	0.345536
cimetidine	Enteritis	9	0.33383
cimetidine	Esophagitis	10	0.332277
cinoxacin	Genital-Diseases-Female	1	0.0880002
cinoxacin	Infertility-Male	2	0.0596458
cinoxacin	Urethritis	3	0.0570612
cinoxacin	Pyelonephritis	4	0.0516835
cinoxacin	Prostatic-Hyperplasia	5	0.0467949
cinoxacin	Prostatitis	6	0.0457876
cinoxacin	Depressive-Disorder	7	0.0403193
cinoxacin	Pregnancy-Ectopic	8	0.0384202
cinoxacin	Urinary-Retention	9	0.0376284
cinoxacin	Hyperlipoproteinemias	10	0.0366918
ciprofloxacin	Conjunctivitis-Bacterial	1	0.278079
ciprofloxacin	Campylobacter-Infections	2	0.269755
ciprofloxacin	Anthrax	3	0.265667
ciprofloxacin	Klebsiella-Infections	4	0.257535
ciprofloxacin	Soft-Tissue-Infections	5	0.252443
ciprofloxacin	Gram-Negative-Bacterial-Infections	6	0.249568
ciprofloxacin	Chlamydia-Infections	7	0.246283
ciprofloxacin	Pneumonia-Pneumocystis	8	0.245018
ciprofloxacin	Eye Infections-Bacterial	9	0.244655
ciprofloxacin	Acanthamoeba-Keratitis	10	0.24443
citalopram	Drug-Toxicity	1	0.404458
citalopram	Anxiety-Disorders	2	0.340864
citalopram	Substance-Related-Disorders	3	0.315729
citalopram	Schizophrenia	4	0.30313
citalopram	Schizophrenia-Paranoid	5	0.297519
citalopram	Poisoning	6	0.290999
citalopram	Bites-Human	7	0.290784
citalopram	Phobic-Disorders	8	0.289861
citalopram	Cocaine-Related-Disorders	9	0.287427
citalopram	Stress-Disorders-Post-Traumatic	10	0.280705
cladribine	Blood-Coagulation-Disorders	1	0.406224
cladribine	Neutropenia	2	0.367942
cladribine	Thrombocytopenia	3	0.364245
cladribine	Histiocytosis	4	0.360853
cladribine	Polycythemia-Vera	5	0.336993
cladribine	Thrombocythemia-Essential	6	0.333157
cladribine	Hematologic-Diseases	7	0.324029
cladribine	Elephantiasis	8	0.323961
cladribine	Drug-Hypersensitivity	9	0.314716
cladribine	Hypereosinophilic-Syndrome	10	0.311682
clemastine	Hypersensitivity	1	0.230775
clemastine	Autoimmune-Diseases	2	0.155519
clemastine	Food-Hypersensitivity	3	0.12769
clemastine	Asthma	4	0.121154
clemastine	Graft-vs-Host-Disease	5	0.105475
clemastine	Thyroiditis-Autoimmune	6	0.103792
clemastine	Drug-Hypersensitivity	7	0.101145
clemastine	Ear-Diseases	8	0.0953782
clemastine	Anaphylaxis	9	0.0907169
clemastine	Addison-Disease	10	0.0799036
clidinium	Colitis-Ulcerative	1	0.223412
clidinium	Fissure-in-Ano	2	0.192007
clidinium	Irritable-Bowel-Syndrome	3	0.172965
clidinium	Stomach-Ulcer	4	0.16866
clidinium	Cholelithiasis	5	0.159058
clidinium	Enteritis	6	0.158536
clidinium	Pancreatitis	7	0.14989
clidinium	Gastroenteritis	8	0.136435
clidinium	Proctocolitis	9	0.131334
clidinium	Liver-Cirrhosis	10	0.129655
clindamycin	Actinomycosis	1	0.422105
clindamycin	Gram-Positive-Bacterial-Infections	2	0.254954
clindamycin	Clonorchiasis	3	0.136766
clindamycin	Leprosy-Lepromatous	4	0.136704
clindamycin	Trypanosomiasis	5	0.134244
clindamycin	Malaria-Avian	6	0.127341
clindamycin	Leprosy-Borderline	7	0.126422
clindamycin	Nocardia-Infections	8	0.121277
clindamycin	Strongyloidiasis	9	0.110324
clindamycin	Blastomycosis	10	0.107179
clobetasol	Pyoderma-Gangrenosum	1	0.245378
clobetasol	Acne-Vulgaris	2	0.244192
clobetasol	Urticaria	3	0.235884
clobetasol	Eczema	4	0.232729
clobetasol	Skin-Diseases	5	0.227405
clobetasol	Dermatitis-Seborrheic	6	0.219463
clobetasol	Skin-Diseases-Eczematous	7	0.219304
clobetasol	Fibrocystic-Breast-Disease	8	0.217823
clobetasol	Myxedema	9	0.217371
clobetasol	Pityriasis-Rosea	10	0.213084
clocortolone	Skin-Diseases	1	0.218474
clocortolone	Rosacea	2	0.208253
clocortolone	Sunburn	3	0.201961
clocortolone	Pityriasis-Rosea	4	0.200768
clocortolone	Skin-Diseases-Eczematous	5	0.200566
clocortolone	Acne-Vulgaris	6	0.194338
clocortolone	Pyoderma-Gangrenosum	7	0.193044
clocortolone	Lupus-Erythematosus-Discoid	8	0.189106
clocortolone	Myxedema	9	0.187939
clocortolone	Dermatitis-Herpetiformis	10	0.187455
clofazimine	Mycobacterium-Infections-Atypical	1	0.260774
clofazimine	Hand-Dermatoses	2	0.0573392
clofazimine	Soft-Tissue-Infections	3	0.0556085
clofazimine	Leg-Dermatoses	4	0.0539184
clofazimine	Rheumatic-Fever	5	0.0505825
clofazimine	Tinea-Versicolor	6	0.0494359
clofazimine	Paracoccidioidomycosis	7	0.0448115
clofazimine	Scabies	8	0.0444661
clofazimine	Dermatitis	9	0.044376
clofazimine	Keratosis	10	0.0435254
clofibrate	Nutritional-and-Metabolic-Diseases	1	0.37636
clofibrate	Magnesium-Deficiency	2	0.327109
clofibrate	Hypercalcemia	3	0.317488
clofibrate	Amyloidosis	4	0.306571
clofibrate	Hypokalemia	5	0.302124
clofibrate	Folic-Acid-Deficiency	6	0.268098
clofibrate	Hypocalcemia	7	0.256314
clofibrate	Diabetes-Mellitus-Type-2	8	0.225157
clofibrate	Hypoglycemia	9	0.209121
clofibrate	Cystinosis	10	0.205637
clomiphene	Urethritis	1	0.143565
clomiphene	Prostatitis	2	0.131405
clomiphene	Urinary-Bladder-Diseases	3	0.124115
clomiphene	Abortion-Spontaneous	4	0.12039
clomiphene	Endometriosis	5	0.116341
clomiphene	Prostatic-Hyperplasia	6	0.110358
clomiphene	Urethral-Diseases	7	0.110224
clomiphene	Kidney-Failure-Acute	8	0.103157
clomiphene	Trichomonas-Vaginitis	9	0.0992474
clomiphene	Genital-Diseases-Female	10	0.0949303
clomipramine	Stress-Disorders-Post-Traumatic	1	0.212929
clomipramine	Overdose	2	0.209708
clomipramine	Tobacco-Use-Disorder	3	0.187325
clomipramine	Opioid-Related-Disorders	4	0.183469
clomipramine	Eating-Disorders	5	0.182026
clomipramine	Schizophrenia-Paranoid	6	0.181585
clomipramine	Attention-Deficit-Disorder-with-Hyperactivity	7	0.173899
clomipramine	Psychotic-Disorders	8	0.17213
clomipramine	Bipolar-Disorder	9	0.166759
clomipramine	Phobic-Disorders	10	0.164932
clonidine	Bites-Human	1	0.396065
clonidine	Drug-Toxicity	2	0.357521
clonidine	Poisoning	3	0.351711
clonidine	Psychotic-Disorders	4	0.339034
clonidine	Stress-Disorders-Post-Traumatic	5	0.333811
clonidine	Neuroleptic-Malignant-Syndrome	6	0.300118
clonidine	Alcohol-Withdrawal-Delirium	7	0.286794
clonidine	Trigeminal-Neuralgia	8	0.279174
clonidine	Tobacco-Use-Disorder	9	0.278852
clonidine	Overdose	10	0.273677
clotrimazole	Mouth-Diseases	1	0.178558
clotrimazole	Xerostomia	2	0.177742
clotrimazole	Sialorrhea	3	0.125395
clotrimazole	Oral-Ulcer	4	0.117101
clotrimazole	Esophageal-Spasm-Diffuse	5	0.0845524
clotrimazole	Urinary-Bladder-Diseases	6	0.0678018
clotrimazole	Leg-Dermatoses	7	0.0512784
clotrimazole	Epidermolysis-Bullosa	8	0.0482588
clotrimazole	Familial-Mediterranean-Fever	9	0.0478707
clotrimazole	Collagen-Diseases	10	0.0441119
cloxacillin	Arthritis-Rheumatoid	1	0.167497
cloxacillin	Radiation-Injuries-Experimental	2	0.161894
cloxacillin	Osteoarthritis	3	0.158024
cloxacillin	Bursitis	4	0.137635
cloxacillin	Burns	5	0.136121
cloxacillin	Arthritis	6	0.133857
cloxacillin	Bronchial-Spasm	7	0.128972
cloxacillin	Osteoporosis-Postmenopausal	8	0.128345
cloxacillin	Bites-Human	9	0.126875
cloxacillin	Polychondritis-Relapsing	10	0.125876
clozapine	Attention-Deficit-Disorder-with-Hyperactivity	1	0.216817
clozapine	Cocaine-Related-Disorders	2	0.215195
clozapine	Attention-Deficit-and-Disruptive-Behavior-Disorders	3	0.211983
clozapine	Depressive-Disorder	4	0.194202
clozapine	Eating-Disorders	5	0.189041
clozapine	Alcoholism	6	0.185235
clozapine	Child-Behavior-Disorders	7	0.178784
clozapine	Anxiety-Disorders	8	0.175893
clozapine	Tobacco-Use-Disorder	9	0.172509
clozapine	Obsessive-Compulsive-Disorder	10	0.1672
colchicine	Hypertriglyceridemia	1	0.328023
colchicine	Abnormalities-Drug-Induced	2	0.291063
colchicine	Arthritis-Gouty	3	0.28935
colchicine	Hypercholesterolemia	4	0.270605
colchicine	Cystinosis	5	0.264878
colchicine	Hyperlipoproteinemia-Type-II	6	0.237587
colchicine	Folic-Acid-Deficiency	7	0.227423
colchicine	Infant-Premature-Diseases	8	0.225164
colchicine	Magnesium-Deficiency	9	0.224762
colchicine	Hypocalcemia	10	0.223508
cromolyn	Anaphylaxis	1	0.226222
cromolyn	Respiratory-Tract-Diseases	2	0.216883
cromolyn	Conjunctivitis-Allergic	3	0.207465
cromolyn	Autoimmune-Diseases	4	0.207135
cromolyn	Pulmonary-Emphysema	5	0.203825
cromolyn	Status-Asthmaticus	6	0.201845
cromolyn	Hypersensitivity	7	0.20142
cromolyn	Respiration-Disorders	8	0.197793
cromolyn	Altitude-Sickness	9	0.185565
cromolyn	Persistent-Fetal-Circulation-Syndrome	10	0.185328
cyclacillin	Prostatitis	1	0.102801
cyclacillin	Respiratory-Tract-Diseases	2	0.0939404
cyclacillin	Escherichia-coli-Infections	3	0.0804009
cyclacillin	Pulmonary-Emphysema	4	0.079729
cyclacillin	Bronchitis	5	0.0769285
cyclacillin	Legionnaires-Disease	6	0.0763517
cyclacillin	Conjunctivitis-Bacterial	7	0.0757721
cyclacillin	Acanthamoeba-Keratitis	8	0.075105
cyclacillin	Conjunctivitis-Viral	9	0.0739995
cyclacillin	Gram-Negative-Bacterial-Infections	10	0.0717089
cyclizine	Necrosis	1	0.0815882
cyclizine	Hiccup	2	0.0641711
cyclizine	Dysmenorrhea	3	0.0626207
cyclizine	Premenstrual-Syndrome	4	0.0625459
cyclizine	Shock	5	0.0617092
cyclizine	Tachycardia-Ventricular	6	0.0607735
cyclizine	Inflammation	7	0.0606426
cyclizine	Amenorrhea	8	0.0598947
cyclizine	Causalgia	9	0.0586763
cyclizine	Edema	10	0.0583065
cyclobenzaprine	Epilepsy-Tonic-Clonic	1	0.339542
cyclobenzaprine	Joint-Diseases	2	0.336987
cyclobenzaprine	Bursitis	3	0.327735
cyclobenzaprine	Clostridium-Infections	4	0.321785
cyclobenzaprine	Osteoporosis-Postmenopausal	5	0.312564
cyclobenzaprine	Epilepsies-Partial	6	0.299476
cyclobenzaprine	Multiple-Sclerosis	7	0.297527
cyclobenzaprine	Essential-Tremor	8	0.293567
cyclobenzaprine	Epilepsy-Absence	9	0.290637
cyclobenzaprine	Spasms-Infantile	10	0.286023
cycloserine	Abnormalities-Drug-Induced	1	0.27533
cycloserine	Infant-Premature-Diseases	2	0.204038
cycloserine	Hyperlipoproteinemias	3	0.178885
cycloserine	Magnesium-Deficiency	4	0.136288
cycloserine	Amyloidosis	5	0.115649
cycloserine	Hypercalcemia	6	0.115387
cycloserine	Hypokalemia	7	0.109224
cycloserine	Hypoprothrombinemias	8	0.107747
cycloserine	Hypocalcemia	9	0.104474
cycloserine	Hypoglycemia	10	0.0994842
cyclothiazide	Tachycardia-Ventricular	1	0.0935154
cyclothiazide	Vasculitis	2	0.0902537
cyclothiazide	Hypertension-Malignant	3	0.0892137
cyclothiazide	Arterial-Occlusive-Diseases	4	0.0884431
cyclothiazide	Atrial-Fibrillation	5	0.0875982
cyclothiazide	Peripheral-Vascular-Diseases	6	0.0858934
cyclothiazide	Tetralogy-of-Fallot	7	0.0817971
cyclothiazide	Arrhythmias-Cardiac	8	0.0804196
cyclothiazide	Ventricular-Premature-Complexes	9	0.0800731
cyclothiazide	Tachycardia-Paroxysmal	10	0.0785988
cyproheptadine	Tremor	1	0.295421
cyproheptadine	Esotropia	2	0.226294
cyproheptadine	Otitis-Media	3	0.210652
cyproheptadine	Neurologic-Manifestations	4	0.209161
cyproheptadine	Spinal-Cord-Injuries	5	0.20534
cyproheptadine	Dyskinesia-Drug-Induced	6	0.202821
cyproheptadine	Epilepsy-Absence	7	0.201303
cyproheptadine	Earache	8	0.200482
cyproheptadine	Iritis	9	0.199226
cyproheptadine	Parkinsonian-Disorders	10	0.195519
cysteamine	Infant-Premature-Diseases	1	0.165004
cysteamine	Amyloidosis	2	0.132486
cysteamine	Hypercalcemia	3	0.131506
cysteamine	Folic-Acid-Deficiency	4	0.128202
cysteamine	Nutritional-and-Metabolic-Diseases	5	0.119421
cysteamine	Magnesium-Deficiency	6	0.104971
cysteamine	Abnormalities-Drug-Induced	7	0.0988072
cysteamine	Hypercholesterolemia	8	0.0987571
cysteamine	Hyperlipoproteinemias	9	0.0975021
cysteamine	Hypokalemia	10	0.0922167
cytarabine	Hematologic-Diseases	1	0.163968
cytarabine	Anemia-Megaloblastic	2	0.156245
cytarabine	Leukemia-Promyelocytic-Acute	3	0.131829
cytarabine	Polycythemia-Vera	4	0.12875
cytarabine	Neuroblastoma	5	0.125042
cytarabine	Sarcoma	6	0.124631
cytarabine	Glioblastoma	7	0.120016
cytarabine	Epstein-Barr-Virus-Infections	8	0.119645
cytarabine	Hypereosinophilic-Syndrome	9	0.117154
cytarabine	Carcinoma	10	0.113846
dacarbazine	Lymphoma	1	0.37188
dacarbazine	Lymphoma-Non-Hodgkin	2	0.305175
dacarbazine	Neoplasms	3	0.289227
dacarbazine	Head-and-Neck-Neoplasms	4	0.289151
dacarbazine	Thyroid-Neoplasms	5	0.270305
dacarbazine	Carcinoma-Squamous-Cell	6	0.268829
dacarbazine	Leukemia-Promyelocytic-Acute	7	0.266179
dacarbazine	Carcinoma-Small-Cell	8	0.264322
dacarbazine	Soft-Tissue-Neoplasms	9	0.263966
dacarbazine	Sarcoma-Kaposi	10	0.263917
dalfopristin	Impetigo	1	0.11229
dalfopristin	Hand-Dermatoses	2	0.068813
dalfopristin	Urticaria	3	0.0478747
dalfopristin	Rheumatic-Diseases	4	0.043577
dalfopristin	Photosensitivity-Disorders	5	0.0382244
dalfopristin	Obsessive-Compulsive-Disorder	6	0.0368093
dalfopristin	Myxedema	7	0.0367117
dalfopristin	Sunburn	8	0.0357421
dalfopristin	Scalp-Dermatoses	9	0.0346656
dalfopristin	Bronchial-Spasm	10	0.03221
danazol	Infertility-Female	1	0.0667633
danazol	Genital-Diseases-Female	2	0.0615557
danazol	Infertility-Male	3	0.0613393
danazol	Nephritis	4	0.0609478
danazol	Pyelonephritis	5	0.0540133
danazol	Foot-Dermatoses	6	0.0526226
danazol	Scalp-Dermatoses	7	0.0484074
danazol	Scleroderma-Systemic	8	0.0471997
danazol	Rosacea	9	0.045827
danazol	Collagen-Diseases	10	0.0451085
dantrolene	Epilepsy-Complex-Partial	1	0.401044
dantrolene	Epilepsy-Tonic-Clonic	2	0.35424
dantrolene	Brain-Edema	3	0.318316
dantrolene	Spasms-Infantile	4	0.305981
dantrolene	Parkinson-Disease-Postencephalitic	5	0.30143
dantrolene	Seizures-Febrile	6	0.278585
dantrolene	Esotropia	7	0.277001
dantrolene	Cluster-Headache	8	0.274562
dantrolene	Epilepsy-Post-Traumatic	9	0.273397
dantrolene	Complex-Regional-Pain-Syndromes	10	0.27298
dapiprazole	Eye-Diseases	1	0.128685
dapiprazole	Scleritis	2	0.119342
dapiprazole	Glaucoma	3	0.114811
dapiprazole	Conjunctivitis	4	0.114332
dapiprazole	Iritis	5	0.105689
dapiprazole	Glaucoma-Open-Angle	6	0.104546
dapiprazole	Uveitis-Anterior	7	0.104328
dapiprazole	Ocular-Hypertension	8	0.0966418
dapiprazole	Uveitis	9	0.0712498
dapiprazole	Blepharospasm	10	0.0709203
dapsone	Graft-vs-Host-Disease	1	0.192601
dapsone	Conjunctivitis-Allergic	2	0.161263
dapsone	Hymenolepiasis	3	0.156698
dapsone	Dermatitis-Atopic	4	0.122609
dapsone	Drug-Hypersensitivity	5	0.115028
dapsone	Autoimmune-Diseases	6	0.113677
dapsone	Pemphigus	7	0.106206
dapsone	Osteoporosis-Postmenopausal	8	0.10324
dapsone	Pemphigoid-Bullous	9	0.10107
dapsone	Lupus-Erythematosus-Systemic	10	0.0994287
daunorubicin	Blood-Coagulation-Disorders	1	0.123855
daunorubicin	Hypereosinophilic-Syndrome	2	0.121605
daunorubicin	Polycythemia-Vera	3	0.111155
daunorubicin	Hematologic-Diseases	4	0.107822
daunorubicin	Leukemia-Promyelocytic-Acute	5	0.0870921
daunorubicin	Neoplasms-Hormone-Dependent	6	0.0853504
daunorubicin	Graft-vs-Host-Disease	7	0.0839489
daunorubicin	Leukemia	8	0.0835385
daunorubicin	Medulloblastoma	9	0.0831399
daunorubicin	Ependymoma	10	0.0806871
delavirdine	Virus-Diseases	1	0.13131
delavirdine	Respiratory-Syncytial-Virus-Infections	2	0.089461
delavirdine	Addison-Disease	3	0.0879647
delavirdine	Nephrotic-Syndrome	4	0.08558
delavirdine	Kidney-Failure-Acute	5	0.0823676
delavirdine	Menopause-Premature	6	0.0763068
delavirdine	Primary-Ovarian-Insufficiency	7	0.0735928
delavirdine	Hypersensitivity	8	0.067503
delavirdine	Infertility-Female	9	0.0642925
delavirdine	Adenovirus-Infections-Human	10	0.0564593
demecarium	Blepharospasm	1	0.244585
demecarium	Keratitis	2	0.241041
demecarium	Scleritis	3	0.209814
demecarium	Iridocyclitis	4	0.209651
demecarium	Macular-Edema	5	0.206214
demecarium	Glaucoma	6	0.200499
demecarium	Ocular-Hypertension	7	0.199607
demecarium	Conjunctivitis	8	0.185445
demecarium	Uveitis	9	0.184477
demecarium	Iritis	10	0.180628
demeclocycline	Hypokalemia	1	0.170949
demeclocycline	Prostatic-Hyperplasia	2	0.134807
demeclocycline	Folic-Acid-Deficiency	3	0.133867
demeclocycline	Urinary-Retention	4	0.133399
demeclocycline	Hypertriglyceridemia	5	0.131663
demeclocycline	Hypoglycemia	6	0.129024
demeclocycline	Menopause-Premature	7	0.126344
demeclocycline	Urethritis	8	0.120343
demeclocycline	Hypocalcemia	9	0.118478
demeclocycline	Infertility-Female	10	0.117137
deserpidine	Torticollis	1	0.312004
deserpidine	Dyskinesia-Drug-Induced	2	0.286492
deserpidine	Tremor	3	0.267664
deserpidine	Psychomotor-Agitation	4	0.0916831
deserpidine	Depressive-Disorder	5	0.0770521
deserpidine	Child-Behavior-Disorders	6	0.0761411
deserpidine	Hypertension-Malignant	7	0.0663614
deserpidine	Intracranial-Embolism-and-Thrombosis	8	0.0656704
deserpidine	Tobacco-Use-Disorder	9	0.0640656
deserpidine	Shock-Cardiogenic	10	0.0572011
desflurane	Osteolysis	1	0.112522
desflurane	Cluster-Headache	2	0.0779886
desflurane	Parkinson-Disease-Postencephalitic	3	0.0765663
desflurane	Seizures-Febrile	4	0.0729667
desflurane	Head-Injuries-Closed	5	0.0723436
desflurane	Intracranial-Hypertension	6	0.0721588
desflurane	Alcohol-Induced-Disorders-Nervous-System	7	0.0698704
desflurane	Brain-Neoplasms	8	0.0688209
desflurane	Epilepsy-Absence	9	0.0680407
desflurane	Neuroleptic-Malignant-Syndrome	10	0.0678942
desipramine	Schizophrenia	1	0.221356
desipramine	Child-Behavior-Disorders	2	0.217754
desipramine	Attention-Deficit-and-Disruptive-Behavior-Disorders	3	0.193655
desipramine	Alcoholism	4	0.183067
desipramine	Bipolar-Disorder	5	0.179703
desipramine	Autistic-Disorder	6	0.17944
desipramine	Bites-Human	7	0.178894
desipramine	Opioid-Related-Disorders	8	0.178554
desipramine	Panic-Disorder	9	0.170893
desipramine	Psychotic-Disorders	10	0.166357
desloratadine	Otitis-Media	1	0.172557
desloratadine	Graft-vs-Host-Disease	2	0.160137
desloratadine	Bronchial-Spasm	3	0.154466
desloratadine	Otitis-Externa	4	0.147016
desloratadine	Hypersensitivity	5	0.146414
desloratadine	Ear-Diseases	6	0.142063
desloratadine	Drug-Hypersensitivity	7	0.125393
desloratadine	Food-Hypersensitivity	8	0.115998
desloratadine	Anaphylaxis	9	0.0957905
desloratadine	Lymphoma-Non-Hodgkin	10	0.0793805
desogestrel	Genital-Diseases-Female	1	0.321123
desogestrel	Endometrial-Hyperplasia	2	0.14349
desogestrel	Infertility	3	0.0730084
desogestrel	Nephritis	4	0.0613573
desogestrel	Kidney-Failure-Chronic	5	0.0589658
desogestrel	Vomiting	6	0.0561186
desogestrel	Pregnancy-Ectopic	7	0.0543457
desogestrel	Foot-Dermatoses	8	0.0536171
desogestrel	Epidermolysis-Bullosa	9	0.0522674
desogestrel	Dyspepsia	10	0.0464163
desonide	Rosacea	1	0.230156
desonide	Fibrocystic-Breast-Disease	2	0.216276
desonide	Hyperhidrosis	3	0.215256
desonide	Scleroderma-Systemic	4	0.215198
desonide	Pyoderma-Gangrenosum	5	0.210175
desonide	Skin-Diseases	6	0.209016
desonide	Gynecomastia	7	0.208427
desonide	Polychondritis-Relapsing	8	0.184944
desonide	Acne-Vulgaris	9	0.182614
desonide	Collagen-Diseases	10	0.181675
desoximetasone	Acne-Vulgaris	1	0.234975
desoximetasone	Collagen-Diseases	2	0.227082
desoximetasone	Keratosis	3	0.225005
desoximetasone	Photosensitivity-Disorders	4	0.210513
desoximetasone	Rosacea	5	0.206345
desoximetasone	Urticaria	6	0.197192
desoximetasone	Lupus-Erythematosus-Discoid	7	0.190008
desoximetasone	Psoriasis	8	0.187373
desoximetasone	Dermatitis-Herpetiformis	9	0.184512
desoximetasone	Fibrocystic-Breast-Disease	10	0.184014
dexamethasone	Conjunctivitis-Allergic	1	0.200065
dexamethasone	Graft-vs-Host-Disease	2	0.190628
dexamethasone	Food-Hypersensitivity	3	0.189217
dexamethasone	Anaphylaxis	4	0.18546
dexamethasone	Leukemia-Lymphocytic-Chronic-B-Cell	5	0.177518
dexamethasone	Autoimmune-Diseases	6	0.165879
dexamethasone	Lymphoma-Non-Hodgkin	7	0.163207
dexamethasone	Vertigo	8	0.157052
dexamethasone	Purpura-Thrombocytopenic-Idiopathic	9	0.153115
dexamethasone	Airway-Obstruction	10	0.152969
dexbrompheniramine	Otitis-Media	1	0.182896
dexbrompheniramine	Ear-Diseases	2	0.171336
dexbrompheniramine	Gastroesophageal-Reflux	3	0.147162
dexbrompheniramine	Respiratory-Distress-Syndrome-Adult	4	0.136358
dexbrompheniramine	Altitude-Sickness	5	0.12421
dexbrompheniramine	Esophageal-Spasm-Diffuse	6	0.123428
dexbrompheniramine	Airway-Obstruction	7	0.113396
dexbrompheniramine	Otitis-Externa	8	0.107878
dexbrompheniramine	Persistent-Fetal-Circulation-Syndrome	9	0.101402
dexbrompheniramine	Respiration-Disorders	10	0.100189
dexmedetomidine	Trigeminal-Neuralgia	1	0.126795
dexmedetomidine	Spinal-Cord-Injuries	2	0.126457
dexmedetomidine	Epilepsy	3	0.112794
dexmedetomidine	Parkinsonian-Disorders	4	0.105951
dexmedetomidine	Intracranial-Hypertension	5	0.102816
dexmedetomidine	Neuroleptic-Malignant-Syndrome	6	0.0991832
dexmedetomidine	Amyotrophic-Lateral-Sclerosis	7	0.0856263
dexmedetomidine	Epilepsy-Tonic-Clonic	8	0.0820543
dexmedetomidine	Epilepsy-Complex-Partial	9	0.0818643
dexmedetomidine	Epilepsies-Partial	10	0.081578
dexrazoxane	Neuroblastoma	1	0.0590954
dexrazoxane	Medulloblastoma	2	0.058896
dexrazoxane	Neoplasms	3	0.0542623
dexrazoxane	Mycosis-Fungoides	4	0.0512365
dexrazoxane	Gastrointestinal-Neoplasms	5	0.0486642
dexrazoxane	Carcinoma	6	0.047491
dexrazoxane	Neoplasms-Hormone-Dependent	7	0.0474718
dexrazoxane	Eczema	8	0.0470026
dexrazoxane	Glioblastoma	9	0.0445458
dexrazoxane	Leukemia-Promyelocytic-Acute	10	0.0441463
dextromethorphan	Pleural-Effusion	1	0.110209
dextromethorphan	Pulmonary-Edema	2	0.104167
dextromethorphan	Bronchial-Spasm	3	0.101947
dextromethorphan	Respiratory-Distress-Syndrome-Adult	4	0.101388
dextromethorphan	Pulmonary-Emphysema	5	0.099026
dextromethorphan	Altitude-Sickness	6	0.0983134
dextromethorphan	Hypertension-Pulmonary	7	0.0975317
dextromethorphan	Cystic-Fibrosis	8	0.0945404
dextromethorphan	Airway-Obstruction	9	0.091027
dextromethorphan	Hypersensitivity	10	0.0899487
dezocine	Osteolysis	1	0.0648567
dezocine	Epilepsy-Absence	2	0.0613407
dezocine	Parkinson-Disease	3	0.0541189
dezocine	Epilepsy-Tonic-Clonic	4	0.0500743
dezocine	Cluster-Headache	5	0.0462758
dezocine	Head-Injuries-Closed	6	0.0404788
dezocine	Epilepsies-Partial	7	0.039182
dezocine	Spinal-Cord-Injuries	8	0.0390635
dezocine	Myositis	9	0.0381433
[truncated: 5,631 more rows]
